# Supplementary material for: Process evaluation of a Structured E-parenting Support (STEPS) in the OPTIMA randomised controlled trial: a protocol
Source: PubMed Central journal article supplement — BMJ Open. 2024 May 17;14(5):e081563. doi: 10.1136/bmjopen-2023-081563 (PMC11103228; doi:10.1136/bmjopen-2023-081563), 2024-05-17
Supplement: bmjopen-2023-081563.draft_revisions.pdf [file bmjopen-2023-081563.draft_revisions.pdf]

# BMJ Open

BMJ Open is committed to open peer review. As part of this commitment we make the peer review history of every article we publish publicly available.

When an article is published we post the peer reviewers' comments and the authors' responses online. We also post the versions of the paper that were used during peer review. These are the versions that the peer review comments apply to.

The versions of the paper that follow are the versions that were submitted during the peer review process. They are not the versions of record or the final published versions. They should not be cited or distributed as the published version of this manuscript.

BMJ Open is an open access journal and the full, final, typeset and author-corrected version of record of the manuscript is available on our site with no access controls, subscription charges or pay-per-view fees (<http://bmjopen.bmj.com>).

If you have any questions on BMJ Open's open peer review process please email [info.bmjopen@bmj.com](mailto:info.bmjopen@bmj.com)

# BMJ Open

## A protocol for the process evaluation of a Structured E-parenting Support (STEPS) in the OPTIMA randomised controlled trial.

|                               |                                                                                                                                                                                                                                                                                                                                                                                                                                                                                                                        |
|-------------------------------|------------------------------------------------------------------------------------------------------------------------------------------------------------------------------------------------------------------------------------------------------------------------------------------------------------------------------------------------------------------------------------------------------------------------------------------------------------------------------------------------------------------------|
| Journal:                      | <i>BMJ Open</i>                                                                                                                                                                                                                                                                                                                                                                                                                                                                                                        |
| Manuscript ID                 | bmjopen-2023-081563                                                                                                                                                                                                                                                                                                                                                                                                                                                                                                    |
| Article Type:                 | Protocol                                                                                                                                                                                                                                                                                                                                                                                                                                                                                                               |
| Date Submitted by the Author: | 02-Nov-2023                                                                                                                                                                                                                                                                                                                                                                                                                                                                                                            |
| Complete List of Authors:     | Hedstrom, Ellen; University of Southampton - Highfield Campus, Psychology<br>Kostyrka-Allchorne, Katarzyna; KCL; Queen Mary University of London<br>French, Blandine; University of Nottingham, Institute of Mental Health<br>Glazebrook, Cristine; University of Nottingham, Psychiatry<br>Hall, Charlotte; Institute of Mental Health, NIHR CLAHRC-East Midlands, Psychiatry<br>Kovshoff, Hanna; University of Southampton, School of Psychology<br>Lean, Nancy; KCL<br>Sonuga-Barke, Edmund; King's College London, |
| Keywords:                     | Randomized Controlled Trial, Behavior, Clinical Trial, eHealth, Protocols & guidelines < HEALTH SERVICES ADMINISTRATION & MANAGEMENT                                                                                                                                                                                                                                                                                                                                                                                   |
|                               |                                                                                                                                                                                                                                                                                                                                                                                                                                                                                                                        |

SCHOLARONE™  
Manuscripts

1  
2  
3 **A protocol for the process evaluation of a Structured E-parenting Support (STEPS) in**  
4 **the OPTIMA randomised controlled trial.**  
5  
6  
7  
8

9 Ellen Hedström<sup>1</sup>, Katarzyna Kostyrka-Allchorne<sup>2,3</sup>, Blandine French<sup>4,5</sup>, Cristine  
10 Glazebrook<sup>4,5</sup>, Charlotte L. Hall<sup>4,5</sup>, Hanna Kovshoff<sup>1</sup>, Nancy Lean<sup>3</sup> and Edmund J.S. Sonuga-  
11 Barke<sup>3,6</sup>.  
12  
13  
14  
15  
16

- 17 1. Centre for Innovation in Mental Health, School of Psychology, Faculty of Environmental  
18 and Life Sciences, University of Southampton, Southampton, UK
- 19 2. Department of Psychology, School of Biological and Behavioural Sciences, Queen  
20 Mary University of London, UK.
- 21 3. Department of Child and Adolescent Psychiatry, Institute of Psychiatry, Psychology &  
22 Neuroscience, King's College London, UK.
- 23 4. Academic Unit of Mental Health & Clinical Neurosciences, Faculty of Medicine &  
24 Health Sciences, University of Nottingham, UK.
- 25 5. Centre for ADHD and Neurodevelopmental Disorders Across the Lifespan CANDAL  
26 Institute of Mental Health, University of Nottingham, UK.
- 27 6. Department of Child & Adolescent Psychiatry, Aarhus University, Denmark.  
28  
29  
30  
31  
32  
33  
34  
35

36 Correspondence: Professor Edmund J.S. Sonuga-Barke, School of Academic Psychiatry,  
37 Institute of Psychiatry, Psychology and Neuroscience, King's College London, London, UK;  
38 Email: [edmund.sonuga-barke@kcl.ac.uk](mailto:edmund.sonuga-barke@kcl.ac.uk)  
39  
40  
41

42 **Funding:** This project is funded by the National Institute for Health Research (NIHR)  
43 Program Grants for Applied Research (RP-PG-0618-20003). The views expressed are those  
44 of the authors and not necessarily those of the NIHR or the Department of Health and Social  
45 Care. The funding body played no role in the study design and conduct.  
46  
47  
48  
49  
50  
51  
52  
53  
54  
55  
56  
57  
58  
59  
60

1  
2  
3 **A protocol for the process evaluation of a Structured E-parenting Support (STEPS) in**  
4 **the OPTIMA randomised controlled trial.**  
5  
6

7 **Abstract**  
8

9 **Introduction:** *Structured E-parenting Support* (STEPS) is a digital application (app)  
10 designed to help parents manage behaviour of their children who are referred to mental health  
11 services and are waiting for an assessment or treatment. STEPS is currently being evaluated  
12 in The Online Parent Training for the Initial Management of ADHD (OPTIMA) randomized  
13 controlled trial. Alongside the examination of STEPS' clinical and cost-effectiveness, we are  
14 conducting a process evaluation to better understand the contextual factors that may influence  
15 study outcomes. The purpose of this protocol is to describe the aims, objectives and  
16 methodology of the process evaluation prior to it taking place to add to the fidelity and rigour  
17 of the trial process and outcomes. Our goal is to adapt STEPS to optimise its benefits in  
18 future applications. **Methods:** In line with the Medical Research Council guidelines for  
19 evaluating complex interventions, the process evaluation will adopt a mixed method design  
20 using qualitative data collected from clinicians and parent interviews and app usage data from  
21 participants assigned to the intervention arm. **Analysis:** Qualitative data from semi-structured  
22 interviews and free text box responses included in trial questionnaires will be analysed  
23 thematically using framework analysis to better understand how parents use STEPS, how it  
24 works and key factors that could aid or hinder its effective implementation in routine clinical  
25 practice. **Ethics:** The application for ethical approval for the study was submitted to the  
26 North West - Liverpool Central Research Ethics Committee and received a favourable  
27 opinion on further information on 26 November 2021, reference number 21/NW/0319.  
28 **Dissemination:** The process evaluation aims to explore how a digital app might support  
29 parents in managing their child's behaviour. Implications for policy and research will be  
30 explored and the clinical implications of offering the app to a wider audience to address the  
31 lack of support to parents as highlighted in this paper. We plan to publish findings in  
32 international, peer-reviewed journals as well as present at conferences.  
33  
34  
35  
36  
37  
38  
39  
40  
41  
42  
43  
44  
45  
46  
47  
48  
49

50  
51 Trial registration: The trial has been prospectively registered on 18 November 2021; ISRCTN  
52 8 16523503. <https://www.isrctn.com/ISRCTN16523503>.  
53  
54

55  
56  
57 **Keywords:** Process evaluation, ADHD, Conduct problems, Randomized Controlled Trial,  
58 Digital health, Parenting intervention  
59  
60

1  
2  
3  
4  
5 Strengths and Limitations of this study  
6

- 7 • Framework analysis allows for in-depth data analysis using a rigorous and transparent  
8 methodology.  
9
- 10 • Outcomes for quantitative data such as app usage metrics will be integrated with  
11 qualitative findings.  
12
- 13 • Inclusion of members from the OPTIMA patient and public involvement panel to  
14 advise on best practice in working with participants as well as assisting in data  
15 analysis and interpretation of the study results.  
16
- 17 • All eligible participants were invited to partake in interviews, including those who did  
18 not complete all timepoints and those who did not download or use the app, to further  
19 understand barriers to uptake and usage of the STEPS app.  
20
- 21 • A potential limitation of this study is the crossover of team members working on both  
22 the RCT and the process evaluation which may influence the interpretation of the  
23 qualitative data.  
24  
25  
26  
27  
28  
29  
30  
31  
32  
33  
34  
35  
36  
37  
38  
39  
40  
41  
42  
43  
44  
45  
46  
47  
48  
49  
50  
51  
52  
53  
54  
55  
56  
57  
58  
59  
60

## INTRODUCTION

Attention-deficit/hyperactivity disorder (ADHD) is a common neuro-developmental condition characterised by symptoms of inattention and/or impulsivity-hyperactivity (1). Children referred for ADHD assessment may also present with co-morbidities such as symptoms of conduct problems (2), which can negatively impact the family (3). The National Institute for Health and Care Excellence (NICE) recommends families should receive support as soon as possible after their referral, however, despite these recommendations, parents frequently endure long waiting times for diagnostic assessment and treatment. The average time between seeking help and receiving an ADHD diagnosis has been estimated as 18.3 months in the UK: the longest average interval compared to other European countries (4). Lengthy waiting times and scarcity of services are the most common barriers to accessing mental health services for children and adolescents as reported by parents (5). Furthermore, these waiting times are likely to get even longer, given consistent rises in the number of referrals to Child and Adolescent Mental Health Services (CAMHS) (6).

A robust body of research has established the efficacy of parent training as a psychosocial intervention for children and young people (7). Research has found that parent training may reduce conduct problems in children with ADHD (8). Moreover, Daley et al. (9) conducted a meta-analysis on behavioural interventions that established improvements in parenting quality as well as a reduction in child ADHD symptoms and conduct problems. However, despite evidence of its efficacy, parent training may not be made available until a diagnosis has been established, leaving parents without support during the lengthy waiting period which can have a detrimental effect on children and their families (10).

Considering evidence that parent training can have a positive outcome for both parent and child, and to provide families with much-needed timely and accessible support, we have developed a digital parenting application called Structured E-Parenting Support (STEPS). Research suggests that digital health interventions (DHIs), such as mobile apps, may have great potential to deliver large-scale, cost-effective support (11). However, there is a real need to understand how health and digital research can work together for effective implementation (12).

### **The STEPS app and OPTIMA trial**

Inspired by the New Forest Parenting Programme (13), STEPS has been designed to support parents of children with ADHD-type symptoms that are accompanied by challenging behaviour and who are awaiting clinical diagnostic assessment.

STEPS is a standalone training delivered via a mobile app that aims to improve parents' understanding of their child's challenging behaviour and increase their perceived self-efficacy to manage such behaviours, as well as facilitate effective parent-child communication. STEPS has one preparatory module, "Introduction", followed by eight separate intervention modules (steps) to be followed in order. Each of the eight steps is designed to take about 20 minutes if completed in one go.

The content is delivered via short videos, audio clips and text, and parents can download resources as well as make notes on their own reflections within each of the modules (steps) (Table 1).

**Table 1.**

*The STEPS app modules' titles and aims.*

| MODULE Title              | Module Aim                                                                                                              |
|---------------------------|-------------------------------------------------------------------------------------------------------------------------|
| 1. Make a fresh start     | To encourage parents to see their child and themselves in a new, more positive way.                                     |
| 2. Look after yourself    | To emphasize the importance for parents to find time for themselves and to make links with other parents.               |
| 3. Get their cooperation  | To explain ways parents can communicate more effectively with their children                                            |
| 4. Build their confidence | To highlight the importance for parents to create situations in which they can praise their child                       |
| 5. Lead by example        | To help parents think of ways they can avoid losing their temper with their children when they are being difficult.     |
| 6. Guide & support them   | To show how parents can help their children navigate difficult situations where they may find themselves getting upset. |
| 7. Give them structure    | To demonstrate how vital it is that everyone signs up to and follows the house rules                                    |
| 8. Reducing conflict      | To explain how using rewards and sanctions can promote better behaviour in children.                                    |

The efficacy and cost-effectiveness of STEPS is currently being evaluated in the Online Parent Training for The Initial Management of ADHD referrals (OPTIMA) randomized controlled trial (14). Optima is a two-arm, superiority parallel randomised controlled trial

1  
2  
3 with an internal pilot. Parents (n=352) are randomly assigned to either the intervention group  
4 (access to the STEPS app for 3 months) or the Wait as Usual comparison group (WAU) on  
5 completion of baseline measures. Questionnaires are administered via a secure platform,  
6 Sealed Envelope, every three months at five timepoints. Participants are recruited from  
7  
8 mental health services across London, Nottingham, Portsmouth, Southampton and  
9  
10 Gloucester, after initial eligibility has been established via a positive screen for high levels of  
11  
12 hyperactivity ( $\geq 8$ ) and conduct problems ( $\geq 4$ ) as measured by the Strengths and Difficulties  
13  
14 Questionnaire (15).

15  
16  
17 The primary outcome of the OPTIMA trial is the severity of behaviour problems at 3 months  
18  
19 post-randomisation compared to WAU care using parent-reported child behaviour problems  
20  
21 measured with the eight-item ODD subscale of the Swanson Nolan and Pelham Rating Scale  
22  
23 (SNAP-IV) (16).

### 24 **Process Evaluation Aims and Objectives**

25  
26 Establishing a methodology by which the process evaluation will adhere to a priori is useful  
27  
28 to ensure rigour and improve trial quality. Using Medical Research Council (MRC)  
29  
30 guidelines (17) this protocol describes the method for the process evaluation of STEPS within  
31  
32 the OPTIMA trial. Furthermore, the Standard Protocol Items: recommendations for  
33  
34 interventional trials (SPIRIT) checklist has been utilised to provide evidence-based guidance  
35  
36 in producing this protocol and is a widely accepted standard for trial protocols (18). Specific  
37  
38 objectives are to:

- 39 1. To assess the i) reach ii) dose iii) fidelity iv) impact and v) context of the intervention.  
40  
41 Table 2 defines the components of process evaluation and shows the methods by  
42  
43 which the required information is gathered.
  - 44 2. To describe how parents implement STEPS.
- 45  
46  
47  
48  
49  
50  
51  
52  
53  
54  
55  
56  
57  
58  
59  
60



**Table 2.***The STEPS Process evaluation components and methodology.*

|          | Description                                                                                                 | Data collected                                                                                                                                                          | Method of evaluation                                                                                                                                                                                                                                                                                                                                                                                   |
|----------|-------------------------------------------------------------------------------------------------------------|-------------------------------------------------------------------------------------------------------------------------------------------------------------------------|--------------------------------------------------------------------------------------------------------------------------------------------------------------------------------------------------------------------------------------------------------------------------------------------------------------------------------------------------------------------------------------------------------|
| Reach    | The extent to which the intervention reached the intended participants as outlined above in criteria        | Data capture via a secure web platform (SE) including age, ethnic origin, education and income of parents and age, gender and ethnicity of child collected at baseline. | Basic statistics including means, ranges and standard deviations. Attrition rates to be calculated at each timepoint.                                                                                                                                                                                                                                                                                  |
| Dose     | Level of intervention delivered and received                                                                | STEPS app data downloaded via the application developers Bitjam.                                                                                                        | STEPS usage data including time spent per STEP before moving on to the next one, time spent within each STEP and number of STEPS completed. Mean times, ranges and standard deviations will be calculated.                                                                                                                                                                                             |
| Fidelity | Was the intervention delivered as intended including exploring adaptations or changes made during the study | Data from captured via a secure web platform (SE) on trial expectations.<br><br>Recordings and minutes from regular PPI panel meetings.                                 | Trial expectations collected at baseline as multiple choice and free text boxes.<br><br>PPI panel feedback on suggestions for change/adaptations.                                                                                                                                                                                                                                                      |
| Impact   | Did the intervention produce change? If so, how?                                                            | Parent and clinician interviews.<br><br>Quantitative data exploring changes in outcome measures (ADHD and ODD).                                                         | 30-45 minute interviews on the experiences of using the STEPS app including technology, engagement with the STEPS, effect on child behaviour and suggestions of adaptations to the app (see appendix A). Interviews with clinicians on noticed effects on patients, barriers to use within the service and other relevant feedback.<br><br>SNAP-IV O and A subscales measured at baseline and 3 months |
| Context  | External factors influencing change in parent and/or child behaviour and intervention uptake.               | Parent interviews exploring changes in child behaviour, clinician interviews, experience of parenting and MAPED feedback.                                               | Interviews as above.<br><br>Data capture via a secure web platform (SE) capturing EoP and MAPED.                                                                                                                                                                                                                                                                                                       |

Note. ADHD=Attention Deficit Hyperactive Disorder; EoP=Experience of Parenting; MAPED= Medical and psychological events and difficulties; ODD=Oppositional Defiance Disorder; PPI=Patient and Public involvement; SE=Sealed Envelope; SNAP IV O (oppositional problems) and A (hyperactive symptoms) (20,21)

3. To explore parents' and clinicians' views concerning the value of STEPS and to describe this in the context of their respective needs.
4. To explore external factors that may have acted as barriers to, or facilitators of, STEPS uptake and engagement.
5. To consider the sustainability of the STEPS app beyond the trial and, if shown to be effective, the possible ways it could be incorporated into the clinical pathways.
6. Evaluation of mechanisms of impact (mediating factors contributing to the outcome) and context (intrapersonal and environmental factors influencing app usage).

Following MRC guidelines for process evaluations (17), a logic model has been developed (Table 3) to elucidate the mechanisms by which the STEPS intervention will produce an outcome and inform the framework of the qualitative analysis. A logic model can be useful in representing the theory of the intervention and its outcomes and helps to clarify the main aspects of the intervention as well as aid in data collection and analysis (19). The STEPS logic model clarifies the current issues in parent support for those waiting on a diagnosis for their child as well as expands on the implications for STEPS use beyond the study. Moreover, by providing a step-by-step process from developing the research question to understanding how outcomes were achieved, it ensures that researchers adhere to the pre-determined process of delivery and analysis.

**Table 3.**

*STEPS Logic Model*

| Problem                                                                                                                                                                                                                                                                                                      | Proposed Solution                                                                                                                                                                   | Input and intervention                                                                                                                                                                                                                                                                                                                                                                                                                                                                                                                                                                                                                                   | Mechanisms of impact                                                                                                                                                                                                                                                                                                                                        | Intended outcomes                                                                                                                                                                                                                                                                                                                                                                                                                | Intended impact                                                                                                                                                                                                                                                                                                                                                                                                                                                                                                                                                                |
|--------------------------------------------------------------------------------------------------------------------------------------------------------------------------------------------------------------------------------------------------------------------------------------------------------------|-------------------------------------------------------------------------------------------------------------------------------------------------------------------------------------|----------------------------------------------------------------------------------------------------------------------------------------------------------------------------------------------------------------------------------------------------------------------------------------------------------------------------------------------------------------------------------------------------------------------------------------------------------------------------------------------------------------------------------------------------------------------------------------------------------------------------------------------------------|-------------------------------------------------------------------------------------------------------------------------------------------------------------------------------------------------------------------------------------------------------------------------------------------------------------------------------------------------------------|----------------------------------------------------------------------------------------------------------------------------------------------------------------------------------------------------------------------------------------------------------------------------------------------------------------------------------------------------------------------------------------------------------------------------------|--------------------------------------------------------------------------------------------------------------------------------------------------------------------------------------------------------------------------------------------------------------------------------------------------------------------------------------------------------------------------------------------------------------------------------------------------------------------------------------------------------------------------------------------------------------------------------|
| <p>ADHD is accompanied by Oppositional Defiant Disorder in up to 90% of referred cases.</p> <p>This is associated with child and parent distress and impairment which often drives referrals.</p> <p>Lengthy waiting times to receive assessment and diagnosis which can add to parent and child stress.</p> | <p>To provide low-intensity, unguided support for parents to help them better manage their children’s challenging behaviour while they are awaiting formal clinical assessment.</p> | <p>Parents are screened via a secure hosting platform (MHE) or through local health services utilising the SDQ (<math>\geq 4</math> conduct problems and <math>\geq 8</math> attention and hyperactive problems).</p> <p>Access to STEPS is given post randomization to the intervention group (n=172) via research administrators and supported via text/email to download and utilise the app. The self-guided, parent training intervention, STEPS, is delivered via a mobile phone application.</p> <p>Parents work through 8 modules (steps) with content delivered via short videos and audio clips. Parents can download additional resources</p> | <p>STEPS draws heavily on the evidence based NFPP. It includes education about ADHD and uses behavioural techniques, including an emphasis on praise. The delivery of the intervention is underpinned by social learning theory.</p> <p>Modelling techniques are used to develop parenting skills (mastery) and to increase confidence (self-efficacy).</p> | <p>Increased parental understanding of ADHD and its impact on child behaviour.</p> <p>Increased knowledge of strategies to manage challenging child behaviour.</p> <p>Development of a positive parenting style.</p> <p>Improved parent-child communication</p> <p>Improved parental well-being and confidence in managing their child’s oppositional behaviour. Reduced levels of oppositionality and defiance in children.</p> | <p>Improved support for parents while waiting on an assessment and diagnosis for their child.</p> <p>Cost-effective and time efficient delivery of parent training, potentially reducing load on stretched child mental health services.</p> <p>Implementation of STEPS into the care pathway for children with symptoms of ADHD.</p> <p>Extension of parent training to more difficult to reach families and those too busy to attend training sessions.</p> <p>Engagement of a broader range of family members and key adults (e.g., fathers/grandparents/child minders)</p> |

| Problem                                                                                                       | Proposed Solution | Input and intervention                                                                                                                                         | Mechanisms of impact | Intended outcomes | Intended impact |
|---------------------------------------------------------------------------------------------------------------|-------------------|----------------------------------------------------------------------------------------------------------------------------------------------------------------|----------------------|-------------------|-----------------|
| Lack of parenting support during waiting times can further add to parent stress and unwanted child behaviour. |                   | and are prompted to reflect on progress via written or audio notes.<br><br>Engagement is encouraged through use of digital buddies and pre-programmed prompts. |                      |                   |                 |

ADHD=Attention Deficit Hyperactive Disorder; MHE=myHealthe; NFPP=New Forest Parenting Program; SDQ=Strength and Difficulties Questionnaire; STEPS= Structured E-parenting support

## METHOD

### Design

This mixed-method process evaluation integrates qualitative and quantitative data. Qualitative data will be gathered from semi-structured interviews with parents and clinicians to explore the implementation of the intervention and the perceived impact of the intervention on parenting and child behaviour as well as expectations about the trial as reported by participants via free text responses on the trial questionnaires. Parallel to this, we will use quantitative data such as demographic data and app usage metrics. Table 2 describes the methods and evaluation of data collection.

### Qualitative data collection

Qualitative data collection will include semi-structured interviews with parents and clinicians and trial expectations. Participants will be approached to take part in interviews if they meet the following criteria i) have consented to be contacted for interviews via the study consent form (optional consent statement), have been randomised to the STEPS arm. Both parents who have completed the three months follow up and those that have not are invited as all parents remain in the study unless they explicitly withdraw. Participants will be invited to take part in interviews irrespective of whether they engaged with the STEPS app or not. Views of participants who have not completed any of the steps are very important in the context of understanding barriers to usage. We aim to recruit n=50 parents for interviews. Participants who have consented to be contacted about interviews will be approached by a researcher other than the one who has enrolled them on the trial to avoid unblinding. Selection and allocation of eligible participants is completed by the trial manager and trial administrators. Researchers will email potential participants an invitation explaining the interview process. The default method for conducting interviews will be a video/phone call (about 45 minutes duration). Participants who wish to complete the interview via email will be sent an adapted interview schedule. The interview will be recorded and stored securely within King's College London cloud storage infrastructure (OneDrive for Business or Microsoft SharePoint) with the transcript. The interview schedule has been developed by a team of experienced qualitative researchers in collaboration with the OPTIMA Patient and Public Involvement group. Questions explore the technical experience of downloading and using the app, views on content and features of the app, such as the STEPS buddies, feedback on if/how the app influenced aspects of

parenting and child behaviour management. They will also ask participants about their thoughts on the effectiveness of STEPS in reducing their child's behavioural challenges and, if applicable, the perceived mechanisms by which STEPS is effective (see appendix A for full interview schedule).

Managers in the clinical services that have supported OPTIMA RCT recruitment will be approached with a request to circulate the clinician information sheet to members of the team. Those interested in taking part are asked to contact the team directly. Clinicians will have been made aware of patient participation via patient notes added to the clinical records system. Clinicians will be asked whether they have received feedback from parents about the app and their thoughts on parents' engagement with STEPS. There are also questions on institutional factors such as implementation feasibility, benefits and obstacles. Clinician interviews can help add depth to the qualitative data in terms of understanding the clinical context in relation to any outcomes shared by parents in terms of contact with services or receiving an assessment and/or diagnosis. Our aim is to include n=10 interviews from clinicians. Clinicians will all be interviewed via phone/video call and data stored as per the participants' data above.

The trial expectations questionnaire completed online using the Sealed Envelope platform contains a free text box on parents' hopes and worries about using the STEPS app.

### **Quantitative data collection**

To determine the intervention's reach, the process evaluation will use data collected from parents at baseline (pre-randomisation) via an online secure platform, Sealed Envelope including demographic data about the parent, such as parent's gender, parent ethnicity, parental education, parent employment status, parent relationship status and family socioeconomic status based on total household income as well as child's age, sex and ethnicity. To describe the severity of oppositional and defiant disorder symptoms and hyperactivity/impulsivity and inattention symptoms in the sample, the respective subscales from the parent-completed SNAP questionnaire will be used (20,21). Furthermore, given that ADHD and ASD often co-occur, mean scores and standard deviations from the Social Communication Questionnaire (SCQ) will be included (22). At baseline, parents are asked about their trial expectations. Parents are also asked about previous engagement in parent training (yes/no answer), expectations of receiving parent training (strongly disagree to strongly agree), and expectations of the STEPS app (strongly disagree to strongly agree).

### **DATA ANALYSIS**

1  
2  
3 Our objectives are to explore the reach, dose, fidelity, impact and context of the intervention.  
4 Qualitative analysis will use a framework approach (23), utilising NVivo version 12,  
5 complemented by quantitative analysis. Framework analysis sits within the broader  
6 qualitative methodology of thematic analysis and allows researchers to compare data across  
7 cases as well as within cases, ensuring the individual's view is retained (23). Researchers will  
8 start by identifying a coding framework that aligns with the objectives of the study. Creating  
9 a data set, researchers will map out the codes and start looking for themes and relationships in  
10 the data set. As data moves from codes to themes, the original research questions as well as  
11 existing literature will be referred to and discussed and reviewed within the multidisciplinary  
12 team to ensure transparency and avoid bias. The method is appropriate for incorporating data  
13 from semi-structured interviews, PPI panel discussions and free text box data from  
14 questionnaires.

15  
16 Descriptive data on the study sample will be presented to include means, SD, medians,  
17 ranges, n values and percentages. Reach and dose will be assessed using app data to look at  
18 the app usage in terms of how many people downloaded it, the number of steps (modules)  
19 completed and timings. In addition, feedback from participants on preferred times (and  
20 places) to use the app and reasons why individual steps were or were not completed will help  
21 provide an overall picture of reach and dose. Attrition rates from the intervention group at  
22 each timepoint will also be explored. Fidelity will be assessed through interviews in terms of  
23 parent feedback on ease of understanding instructions given both via the app as well as the  
24 research team. Any changes made to instructions part way through the study will also be  
25 considered in terms of how changes may have impacted usage, for example, further  
26 instructions given to participants on how to download and engage with the app sent  
27 throughout the study to encourage uptake.

28  
29 The impact will be evaluated through analysis of the transcripts. Parents will be asked for  
30 specific examples of when and how they used learnings from the app and any perceived  
31 effect on child behaviour. Parents will also be asked more generally about any impact the app  
32 has had on their lives. Quantitative data measuring changes in oppositional behaviour (SNAP  
33 (O)) between baseline and 3 months and making within-group comparisons will also help to  
34 assess impact of the app. Context will be measured using data from the interviews. Parents  
35 are asked specifically about where and when they used the app, external factors influencing  
36 app usage at the time (e.g., changes in normal routines at home) and any noticeable changes  
37 in child behaviour during this time. Interviews with parents will also allow us to understand  
38  
39  
40  
41  
42  
43  
44  
45  
46  
47  
48  
49  
50  
51  
52  
53  
54  
55  
56  
57  
58  
59  
60

1  
2  
3 barriers or facilitators of STEPS usage and uptake. Furthermore, family and socioeconomic  
4 data will be included such as family composition and work status.

### 6 **Data integration**

7  
8 The qualitative data extracted from interviews with parents and clinicians as well as text box  
9 data exploring parents' expectations from the study will provide the main source of data to  
10 explore the aims and objectives of the process evaluation. Alongside this descriptive data  
11 from the online questionnaires will be used, both to provide context to the qualitative data in  
12 terms of demographics, but also to help refine the themes emerging from the qualitative data  
13 analysis. Mixed methods afford multiple perspectives and seek to converge the findings (24).  
14 Researchers will analyse the data synchronously and integrate the outcomes from the  
15 different datasets to provide a holistic overview of the results.

### 22 **Patient and Public Involvement (PPI)**

23 The OPTIMA RCT and STEPS app were developed in conjunction with an advisory board  
24 made up of parents of children with neurodevelopmental disorders including ADHD. In  
25 addition to regular PPI panel meetings throughout the study period, panel members advised  
26 on subjects such as how to most effectively communicate with parents, suggestions of how  
27 best to reward parents for their time in the study and other study questions. Further, members  
28 will be involved in the data analysis process, reading transcripts and taking part in meetings  
29 to discuss codes and meanings with OPTIMA researchers.

### 36 **Ethics and Dissemination**

37 All participants in the study consented to take part via e-consent on Sealed Envelope after  
38 having received written and oral information about the study including a brief participant  
39 information sheet (PIS) with condensed information in an easy-to-understand format and as  
40 well as a full PIS for their reference. All parents received a counter signed, by the researcher,  
41 copy of their consent form. The study received ethical approval from the North West -  
42 Liverpool Central Research Ethics Committee on 26 November 2021, reference number  
43 21/NW/0319. Findings will be published in open access, peer-reviewed scientific journals as  
44 well as be presented at conferences.

### 51 **DISCUSSION**

52 STEPS is a digital, self-guided app that is currently being evaluated in the OPTIMA RCT  
53 (14). To better understand the study outcomes and contextual factors influencing these, we  
54 are conducting a process evaluation using qualitative and quantitative data gathered from  
55 parents, clinicians, app usage and demographic data. We expect the results to allow us to  
56 understand how the app has worked, such as if it worked as intended, with the aim of  
57  
58  
59  
60



1  
2  
3 understanding the implications of the potential wider use of STEPS, especially within a  
4 clinical setting. In understanding the strengths and weaknesses of the intervention, how the  
5 intervention was delivered and whether the intended audience received the intervention and  
6 how the app can be further developed and improved to attain its intended purpose, we aim to  
7 provide support to parents awaiting clinical assessment and/or diagnosis for their child and  
8 make the app available to those parents who may need it.  
9

10 Research suggests that DHIs may have great potential to deliver large-scale, cost-effective  
11 support (11). The STEPS app may be able to bridge the gap between lengthy waiting times  
12 for a diagnosis of ADHD and the strains of managing difficult child behaviour. Furthermore,  
13 the study will contribute to a body of research that aims to understand how digital  
14 interventions work and the factors that contribute to their efficacy, with the aim of improving  
15 and understanding the practical implication of using STEPS as a viable DHI to be accessed  
16 by a wider population.  
17

### 18 **Strength and limitations**

19 Integrating qualitative and quantitative data provides a comprehensive evaluation of the way  
20 in which the intervention has worked. Capturing the lived experience of parents through  
21 interviews will give valuable insight into both the mechanics of how the app works as well as  
22 the impact on parenting and child behaviour. The data from the app provide detailed  
23 measures of how the app was used by participants and will help to better understand how the  
24 app was utilised (e.g., the number of times app was used or the length of time per each app  
25 use).  
26

27 Limitations in terms of breadth of participant involvement may occur, for example,  
28 participants who do not engage with the study may be less likely to respond to invites to take  
29 part in interviews. Participants' interview invites clearly state that the researchers are  
30 interested in all views, including those who did not engage with the STEPS app to ensure as  
31 wide reach as possible is attained.  
32

33 Interviews with clinicians may provide limited data as many parents in the study will not yet  
34 have been assessed, even after completing the final 12-month timepoint, meaning clinicians  
35 may have limited feedback/views from the parents regarding the app.  
36

### 37 **Conclusion**

38 Process evaluations are an essential part of evaluating complex interventions to understand  
39 the potential causal mechanisms within the study. Within research, transparency of  
40 implementation and rigour and validity throughout the trial is essential. A process evaluation  
41 can further the understanding of the mechanisms by which an intervention is successful and  
42

1  
2  
3 for whom it is successful and in what circumstances. Preparing a protocol prior to the  
4 process evaluation taking place will further ensure that the planned methodology is adhered  
5 to, adding to the validity of the process evaluation. Furthermore, a process evaluation may  
6 establish fidelity and quality of the implementation and mechanisms of change and help to  
7 understand the context in which the intervention is effective (25).  
8  
9  
10  
11  
12

### 13 **Acknowledgements**

14  
15  
16 The authors would like to acknowledge and thank the expert members of the PPI panel.  
17

18 This study represents independent research part funded by the NIHR Biomedical Research  
19 Centre at South London and Maudsley NHS Foundation Trust and King's College London.  
20 The views expressed are those of the authors and not necessarily those of the NHS, the NIHR  
21 or the Department of Health.  
22  
23  
24  
25  
26  
27  
28  
29  
30  
31  
32  
33  
34  
35  
36  
37  
38  
39  
40  
41  
42  
43  
44  
45  
46  
47  
48  
49  
50  
51  
52  
53  
54  
55  
56  
57  
58  
59  
60

**REFERENCES**

1. Dalrymple RA, Maxwell LM, Russell S, Duthie J. NICE guideline review: Attention deficit hyperactivity disorder: diagnosis and management (NG87). *Archives of disease in childhood-education and practice*. 2020 Oct 1;105(5):289-93.
2. Jensen PS, Martin D, Cantwell DP. Comorbidity in ADHD: Implications for research, practice, and DSM-V. *Journal of the American Academy of Child & Adolescent Psychiatry*. 1997 Aug 1;36(8):1065-79.
3. Theule J, Wiener J, Tannock R, Jenkins JM. Parenting stress in families of children with ADHD: A meta-analysis. *Journal of emotional and behavioral disorders*. 2013 Mar;21(1):3-17.
4. Fridman M, Banaschewski T, Sikirica V, Quintero J, Chen KS. Access to diagnosis, treatment, and supportive services among pharmacotherapy-treated children/adolescents with ADHD in Europe: data from the Caregiver Perspective on Pediatric ADHD survey. *Neuropsychiatric disease and treatment*. 2017 Mar 30:947-58.
5. Reardon T, Harvey K, Baranowska M, O'brien D, Smith L, Creswell C. What do parents perceive are the barriers and facilitators to accessing psychological treatment for mental health problems in children and adolescents? A systematic review of qualitative and quantitative studies. *European child & adolescent psychiatry*. 2017 Jun;26:623-47.
6. Ball WP, Black C, Gordon S, Ostrovska B, Paranjothy S, Rasalam A, Ritchie D, Rowlands H, Rzewuska M, Thompson E, Wilde K. Inequalities in children's mental health care: analysis of routinely collected data on prescribing and referrals to secondary care. *BMC psychiatry*. 2023 Dec;23(1):1-8.
7. Garbacz LL, Brown DM, Spee GA, Polo AJ, Budd KS. Establishing treatment fidelity in evidence-based parent training programs for externalizing disorders in children and adolescents. *Clinical Child and Family Psychology Review*. 2014 Sep;17:230-47.
8. Hartman RR, Stage SA, Webster-Stratton C. A growth curve analysis of parent training outcomes: Examining the influence of child risk factors (inattention, impulsivity, and hyperactivity problems), parental and family risk factors. *Journal of child psychology and psychiatry*. 2003 Mar;44(3):388-98.
9. Daley D, Van der Oord S, Ferrin M, Danckaerts M, Doepfner M, Cortese S, Sonuga-Barke EJ, European ADHD Guidelines Group. Behavioral interventions in attention-

- 1  
2  
3 deficit/hyperactivity disorder: a meta-analysis of randomized controlled trials across  
4 multiple outcome domains. *Journal of the American Academy of Child & Adolescent*  
5 *Psychiatry*. 2014 Aug 1;53(8):835-47.  
6  
7  
8  
9 10. Gullhav AN, Skomsvoll JF, Heimstad R, Schultz JS. Reducing waiting times from 65  
10 to under 40 days for children and adolescents receiving mental health services using a  
11 new scheduling policy. *Health Services Management Research*. 2022 Aug  
12 31:09514848221122895.  
13  
14  
15 11. Murray E, Hekler EB, Andersson G, Collins LM, Doherty A, Hollis C, Rivera DE,  
16 West R, Wyatt JC. Evaluating digital health interventions: key questions and  
17 approaches. *American journal of preventive medicine*. 2016 Nov 1;51(5):843-51.  
18  
19 12. Duffy A, Christie GJ, Moreno S. The challenges toward real-world implementation of  
20 digital health design approaches: narrative review. *JMIR Human Factors*. 2022 Sep  
21 9;9(3):e35693.  
22  
23  
24 13. Sonuga-Barke EJ, Thompson M, Abikoff H, Klein R, Brotman LM.  
25 Nonpharmacological interventions for preschoolers with ADHD: The case for  
26 specialized parent training. *Infants & Young Children*. 2006 Apr 1;19(2):142-53.  
27  
28 14. Kostyrka-Allchorne K, Ballard C, Byford S, Cortese S, Daley D, Downs J, French B,  
29 Glazebrook C, Goldsmith K, Hall CL, Hedstrom E. Online Parent Training for The  
30 Initial Management of ADHD referrals (OPTIMA): the protocol for a randomised  
31 controlled trial of a digital parenting intervention implemented to support parents and  
32 children on a treatment waitlist. *Trials*. 2022 Dec 12;23(1):1003.  
33  
34  
35 15. Goodman R. The Strengths and Difficulties Questionnaire: a research note. *Journal of*  
36 *child psychology and psychiatry*. 1997 Jul;38(5):581-6.  
37  
38  
39 16. Swanson JM, Kraemer HC, Hinshaw SP, Arnold LE, Conners CK, Abikoff HB,  
40 Clevenger W, Davies M, Elliott GR, Greenhill LL, Hechtman L. Clinical relevance of  
41 the primary findings of the MTA: success rates based on severity of ADHD and ODD  
42 symptoms at the end of treatment. *Journal of the American Academy of Child &*  
43 *Adolescent Psychiatry*. 2001 Feb 1;40(2):168-79.  
44  
45  
46 17. Moore GF, Audrey S, Barker M, Bond L, Bonell C, Hardeman W, Moore L,  
47 O’Cathain A, Tinati T, Wight D, Baird J. Process evaluation of complex  
48 interventions: Medical Research Council guidance. *bmj*. 2015 Mar 19;350.  
49  
50  
51 18. Chan AW, Tetzlaff JM, Altman DG, Laupacis A, Gøtzsche PC, Krleža-Jerić K,  
52 Hróbjartsson A, Mann H, Dickersin K, Berlin JA, Doré CJ. SPIRIT 2013 statement:  
53  
54  
55  
56  
57  
58  
59  
60

- 1  
2  
3 defining standard protocol items for clinical trials. *Annals of internal medicine*. 2013  
4 Feb 5;158(3):200-7.  
5  
6  
7 19. Morgan trimmer et al. Creating a logic model for an intervention: evaluation in health  
8 and wellbeing (internet). (2018, August 07). Available from  
9 [https://www.gov.uk/guidance/evaluation-in-health-and-wellbeing-creating-a-logic-](https://www.gov.uk/guidance/evaluation-in-health-and-wellbeing-creating-a-logic-model)  
10 [model](https://www.gov.uk/guidance/evaluation-in-health-and-wellbeing-creating-a-logic-model)  
11  
12  
13 20. Swanson JM. The SNAP Rating Scale for the Diagnosis of the Attention Deficit  
14 Disorder.  
15  
16 21. Swanson JM. School-based assessments and interventions for ADD students. KC  
17 publishing; 1992.  
18  
19 22. Rutter M. Social communication questionnaire. (No Title). 2003.  
20  
21 23. Gale NK, Heath G, Cameron E, Rashid S, Redwood S. Using the framework method  
22 for the analysis of qualitative data in multi-disciplinary health research. *BMC medical*  
23 *research methodology*. 2013 Dec;13(1):1-8.  
24  
25 24. Almeida F. Strategies to perform a mixed methods study. *European Journal of*  
26 *Education Studies*. 2018 Aug 30.  
27  
28 25. Skivington K, Matthews L, Simpson SA, Craig P, Baird J, Blazeby JM, Boyd KA,  
29 Craig N, French DP, McIntosh E, Petticrew M. A new framework for developing and  
30 evaluating complex interventions: update of Medical Research Council guidance.  
31 *bmj*. 2021 Sep 30;374.  
32  
33  
34  
35  
36  
37  
38  
39  
40  
41  
42  
43  
44  
45  
46  
47  
48  
49  
50  
51  
52  
53  
54  
55  
56  
57  
58  
59  
60

## PARENT INTERVIEW SCHEDULE

### Preamble

- Check that the interviewee has received the information sheet, has initialled the box stating they are happy to be contacted for an interview on consent form, understands the OPTIMA trial project and his/her role in it.
- Explain that:
  - The aim of the OPTIMA study is to investigate whether a digital parent education programme, STEPS, can help parents to become more confident and effective in managing their children's difficult behaviour.
  - The research team is talking to some of the parents who are taking part in the study to see how they feel about participating in the trial and using the STEPS app.
  - We are interested in individual experiences and thoughts about STEPS, so please give honest responses, as both positive and negative feedback will help us improve the intervention.
  - We will ask questions relating to your expectations of STEPS, its impact on your parenting and on your child.
  - We will combine all our interview responses so that we can provide an overall picture of parents' views about STEPS. Any comments in the study report are attributed very generally, for example, "A parent commented that..." All comments/opinions will be strictly confidential.

Ask: Do you have any initial questions about the project?

### **Ethics**

- The interview will take about 30-45 minutes
- You do not have to answer any questions that you are not comfortable with and there are no 'right' or 'wrong' answers.
- You can turn your camera off, if you prefer.
- You can stop at any time, no explanation needed
- If you need a comfort break, please just say, that's absolutely fine
- If any question doesn't make sense, ask for an explanation.
- You will receive a £20 shopping voucher as a thank you for taking part. A voucher will be emailed to you within the next 5-7 days.

With your permission we are going to audio/video (if you keep your camera on) record the interview so that we can focus on what you are saying. The interviews will be transcribed by a member of our research team. We remove any reference to any places, clinicians/therapists/family members that may give away your (or others) identity during transcription.

1  
2  
3 The original transcription will be stored in a restricted-access folder restricted-access folder on the  
4 King's College London (KCL) cloud server, and no one other than immediate members of the  
5 research team can access this.  
6

7 Anonymised quotes from transcripts will be used in written reports, published journal articles and  
8 presentations including online. Again, any reference to places/family members/clinicians and so on  
9 will be removed.  
10

11 *Ask:* Do you have any questions about how we use your comments? Please feel free to ask anything  
12 however minor it may seem at this stage or at any time later.  
13

14 *Ask:* Is it okay to record the interview?  
15

- 16 • If participant not satisfied: answer any questions they have. If they do not want to participate,  
17 thank them for their time and finish the interview at this point.  
18  
19

### 20 **Explain procedure**

21  
22  
23 I will begin the interview with my name, the date, time and the identifying code we have assigned to  
24 you and your child - this is just to keep the recordings organised. All your identifying details will be  
25 removed when the data is transcribed. The first part will be a little about yourself and your family,  
26 followed by general questions about the project such as how you were recruited and your  
27 expectations, then moving on to the STEPS programme more specifically and then ending with any  
28 recommendations and your overall experience of being involved in OPTIMA.  
29  
30

31 *Ask:* Do you have any questions before we start?  
32

33 *Ask:* Is it okay for me to start recording now?  
34

35 *State researcher's name, date, time, and identifying code (for data management)*  
36

### 37 **Warm up**

38  
39 Please tell me a bit about your family. Where do you live? How many children do you have?  
40  
41

42 Can you tell me why you went for an assessment for your child (name). Did you go via school? Did  
43 you self-refer? GP?  
44

45 Thinking about the last three months you have taken part in the trial, have you noticed any changes  
46 in your child's behaviour? Types of behaviour? Severity of behaviour? Frequency and so on.  
47  
48

### 49 **I am now going to ask you some questions about being part of the OPTIMA trial and using the** 50 **STEPS app.**

- 51 1) Tell me a bit more about your technical experience of using the app  
52 - How did you feel about the downloading/logging on process?  
53 - Was it technically easy to use/easy to understand?  
54 - How did you feel about the way the material was presented? Was it easy to navigate  
55 each STEP  
56 - Did you receive reminders to use the app? If so, how did you feel about these (eg length,  
57 regularity)  
58  
59  
60

- 1  
2  
3  
4  
5  
6 2) Tell me a bit more about what you thought about the content of STEPS
- 7 - What did you think about what was included? (thinking about the videos/text)
  - 8 - How did you decide which buddy to choose? Did you change buddies at all while using
  - 9 the app? What did you think about the buddies? (If they did not like the buddies, probe
  - 10 asking what would have made them like them better/what type of buddy would they
  - 11 like to see).
  - 12
  - 13 - If you used the STEPS that included examples with children, what did you think about
  - 14 these examples? (Probe would they have like to see more of the children? If they did not
  - 15 like these examples, why?)
  - 16
  - 17 - Was there any content that you felt worked particularly well? Anything that could have
  - 18 done better?
  - 19
  - 20
- 21 3) Using the app
- 22 - At the time of using the app, what did your life look like? Would you say it was as
  - 23 normal, busier, quieter?
  - 24
  - 25 - Did you go through all the STEPS? If not, which/how many STEPS did you do?
  - 26
  - 27 - If you did not complete all STEPS was there a reason for this? What, if anything, would
  - 28 have made you complete all 8 STEPS?
  - 29
  - 30 - How did you find fitting the recommendations/strategies into everyday life?
  - 31
  - 32 - Were there any times of day in particular that you used the app?
  - 33
  - 34 - Were there any particular places that you used the app? Prompt: At home, car, on
  - 35 school run etc
  - 36
  - 37 - Did you use the STEP in the order it was set out or did you move around within each
  - 38 STEP (eg download resources before watching the film clip).
  - 39
  - 40 - Did you complete a STEP all in one go or did you dip in and out?
  - 41
  - 42 - Did you show the app or talk about it to anyone in your family such as partner or
  - 43 grandparents? Did anyone else interact with the app? If so, how often?
  - 44
- 45 4) Implementing the app
- 46 - Did STEPS influence the way you approached your child's behaviour? If yes, in what way.
  - 47 If no, why do you think this was?
  - 48
  - 49 - Did you use any of the strategies in the app? If so which ones? If you did not make any
  - 50 changes to parenting or your thinking, why?
  - 51
- 52 5) Expectations and reality of using the app
- 53 - Thinking about your **expectations** of STEPS prior to usage. How effective did you
  - 54 **expect** it to be? Prompt for expected effects
  - 55
  - 56 - Did you expect benefits in any other aspects of life?
  - 57
  - 58 - Thinking about the **reality** of using the STEPS once you had started using it. How
  - 59 effective did you find it to be? Prompt for impact on child's behaviour.
  - 60
  - 61 - Did you find benefits in any other aspects of life?
  - 62
  - 63 - Which aspects of the STEPS programme were particularly helpful/unhelpful?



1  
2  
3 **Follow up question depending on answer:** You have mentioned that the programme  
4 impacted on X (Follow-up from previous questions). How do you think STEPS influenced  
5 that? Was there anything that influenced the impact that STEPS had? If no impacts prompt  
6 why?  
7  
8

9 6) Would you change anything about the STEPS intervention?

- 10 - What additional information, if any, should be included?
- 11 - Was anything included that was unnecessary?

12  
13  
14  
15 7) How did you feel about receiving STEPS as a digital intervention?

- 16 - Would you have preferred another format? If so what?

17  
18 8) Had you received any parent training prior to (or during) being offered STEPS? If no move on to  
19 next question. If yes, ask

- 20 - What type of parenting training did you receive? When did you receive it?
- 21 - Did the other PT change the way you viewed STEPS? Probe: Was it helpful? Different?

22  
23  
24  
25  
26  
27 Thank you for answering these questions. We only have a few questions left now and these will  
28 focus on the future of STEPS:  
29

### 30 **Future Direction**

31  
32  
33 8) If the STEPS programme is found to be effective, are there any changes you can think of that  
34 we should make before it is routinely offered to parents seeking help for their child's  
35 behavioural difficulties?  
36

37  
38  
39 9) At what point in seeking support from a service do you think it would be most helpful for  
40 parents to be given access to STEPS?

- 41 - How should this access be given (e.g. through the school, GP, CAMHS)
- 42 - Would you recommend the STEPS programme to other parents whose children need support?
- 43 - Can you give me a few words that you would use to describe the STEPS app to someone else?

44  
45  
46 **For the final questions I wanted to ask about your experiences of the recruitment process into the**  
47 **OPTIMA trial. The OPTIMA trial is a study where we are testing whether providing support to**  
48 **parents on a service waitlist via a mobile phone app is an effective way of helping them to deal**  
49 **with some parenting challenges.**  
50

51  
52 10) How did you feel about the way you were approached to take part? If you remember how  
53 long you had been on the waiting list when we contacted you, would you have preferred to  
54 be contacted earlier or later on?  
55

56  
57 11) What made you decide to take part in the study? What were your initial thoughts about the  
58 OPTIMA study?  
59  
60

1  
2  
3 12) How did you feel when you were told you would be testing the STEPS app?

- 4 - What did you hope to get out of testing the app from both you and your child's point of  
5 view?  
6  
7

8 13) Finally, what did you think of the online questionnaires such as how long they took, the ease of  
9 understanding the questions and getting a voucher as an incentive.  
10  
11

### 12 **End of questions**

13  
14 That reaches the end of the interview and questions I wanted to ask you.

15  
16 Thank you so much for giving me your time.

- 17  
18 • Do you have anything else you wish to speak about that hasn't been mentioned?  
19  
20 • Let interviewee talk if they have anything else to add  
21  
22 • If nothing else – then close interview  
23

24 If you are okay to end the interview there, I will stop recording now.  
25  
26

27 *Stop recording*  
28  
29

### 30 **Mood Repair**

31  
32  
33 Ask the participant if they have anything nice planned for the rest of the day. If they have any family  
34 plans for the weekend (or similar ensuring the participants mood is lifted before you close the  
35 interview).  
36

### 37 **Debriefing**

- 38  
39  
40 • Ask how they are feeling – whether anything in the interview has troubled them or  
41 distressed them or if anything requires clarification  
42  
43 • They can email me if they have any follow up questions  
44  
45 • Thank them again, and ask if they are feeling okay to end interview here.  
46  
47 • Remind about the voucher.  
48  
49  
50  
51  
52  
53  
54  
55  
56  
57  
58  
59  
60

# BMJ Open

## A protocol for the process evaluation of a Structured E-parenting Support (STEPS) in the OPTIMA randomised controlled trial.

|                                 |                                                                                                                                                                                                                                                                                                                                                                                                                                                                                                                       |
|---------------------------------|-----------------------------------------------------------------------------------------------------------------------------------------------------------------------------------------------------------------------------------------------------------------------------------------------------------------------------------------------------------------------------------------------------------------------------------------------------------------------------------------------------------------------|
| Journal:                        | <i>BMJ Open</i>                                                                                                                                                                                                                                                                                                                                                                                                                                                                                                       |
| Manuscript ID                   | bmjopen-2023-081563.R1                                                                                                                                                                                                                                                                                                                                                                                                                                                                                                |
| Article Type:                   | Protocol                                                                                                                                                                                                                                                                                                                                                                                                                                                                                                              |
| Date Submitted by the Author:   | 26-Feb-2024                                                                                                                                                                                                                                                                                                                                                                                                                                                                                                           |
| Complete List of Authors:       | Hedstrom, Ellen; University of Southampton - Highfield Campus, Psychology<br>Kostyrka-Allchorne, Katarzyna; KCL; Queen Mary University of London<br>French, Blandine; University of Nottingham, Institute of Mental Health<br>Glazebrook, Cristine; University of Nottingham, Psychiatry<br>Hall, Charlotte; Institute of Mental Health, NIHR CLAHRC-East Midlands, Psychiatry<br>Kovshoff, Hanna; University of Southampton, School of Psychology<br>Lean, Nancy; KCL<br>Sonuga-Barke, Edmund; King's College London |
| <b>Primary Subject Heading</b>: | Qualitative research                                                                                                                                                                                                                                                                                                                                                                                                                                                                                                  |
| Secondary Subject Heading:      | Evidence based practice, Health economics                                                                                                                                                                                                                                                                                                                                                                                                                                                                             |
| Keywords:                       | Randomized Controlled Trial, Behavior, Clinical Trial, eHealth, Protocols & guidelines < HEALTH SERVICES ADMINISTRATION & MANAGEMENT                                                                                                                                                                                                                                                                                                                                                                                  |
|                                 |                                                                                                                                                                                                                                                                                                                                                                                                                                                                                                                       |

SCHOLARONE™  
Manuscripts

1  
2  
3 **A protocol for the process evaluation of a Structured E-parenting Support (STEPS) in**  
4 **the OPTIMA randomised controlled trial.**  
5  
6  
7  
8

9 Ellen Hedström<sup>1</sup>, Katarzyna Kostyrka-Allchorne<sup>2,3</sup>, Blandine French<sup>4,5</sup>, Cristine  
10 Glazebrook<sup>4,5</sup>, Charlotte L. Hall<sup>4,5</sup>, Hanna Kovshoff<sup>1</sup>, Nancy Lean<sup>3</sup> and Edmund J.S. Sonuga-  
11 Barke<sup>3,6</sup>.  
12  
13  
14

- 15  
16  
17 1. Centre for Innovation in Mental Health, School of Psychology, Faculty of Environmental  
18 and Life Sciences, University of Southampton, Southampton, UK
- 19 2. Department of Psychology, School of Biological and Behavioural Sciences, Queen  
20 Mary University of London, UK.
- 21 3. Department of Child and Adolescent Psychiatry, Institute of Psychiatry, Psychology &  
22 Neuroscience, King's College London, UK.
- 23 4. NIHR MindTech MedTech Co-operative, Academic Unit of Mental Health & Clinical  
24 Neurosciences, Faculty of Medicine & Health Sciences, University of Nottingham, UK.
- 25 5. Centre for ADHD and Neurodevelopmental Disorders Across the Lifespan CANDAL  
26 Institute of Mental Health, University of Nottingham, UK.
- 27 6. Department of Child & Adolescent Psychiatry, Aarhus University, Denmark.  
28  
29  
30  
31  
32

33 Correspondence: Professor Edmund J.S. Sonuga-Barke, School of Academic Psychiatry,  
34 Institute of Psychiatry, Psychology and Neuroscience, King's College London, London, UK;  
35 Email: [edmund.sonuga-barke@kcl.ac.uk](mailto:edmund.sonuga-barke@kcl.ac.uk)  
36  
37  
38  
39

40 **Funding:** This project is funded by the National Institute for Health Research (NIHR)  
41 Program Grants for Applied Research (RP-PG-0618-20003). The views expressed are those  
42 of the authors and not necessarily those of the NIHR or the Department of Health and Social  
43 Care. The funding body played no role in the study design and conduct.  
44  
45  
46  
47  
48  
49  
50  
51  
52  
53  
54  
55  
56  
57  
58  
59  
60

1  
2  
3 **A protocol for the process evaluation of a Structured E-parenting Support (STEPS) in**  
4 **the OPTIMA randomised controlled trial.**  
5  
6

7 **Abstract**  
8

9  
10 **Introduction:** *Structured E-parenting Support* (STEPS) is a digital application (app)  
11 designed to help parents manage behaviour of their children who are referred to mental health  
12 services and are waiting for an assessment or treatment. STEPS is currently being evaluated  
13 in The Online Parent Training for the Initial Management of ADHD (OPTIMA) randomized  
14 controlled trial. Alongside the examination of STEPS' clinical and cost-effectiveness, we are  
15 conducting a process evaluation to better understand the contextual factors that may influence  
16 study outcomes. The purpose of this protocol is to describe the aims, objectives and  
17 methodology of the process evaluation prior to it taking place to add to the fidelity and rigour  
18 of the trial process and outcomes. Our goal is to adapt STEPS to optimise its benefits in  
19 future applications. **Methods:** In line with the Medical Research Council guidelines for  
20 evaluating complex interventions, the process evaluation will adopt a mixed method design  
21 using qualitative data collected from clinicians and parent interviews and app usage data from  
22 participants assigned to the intervention arm. **Analysis:** Qualitative data from semi-structured  
23 interviews and free text box responses included in trial questionnaires will be analysed  
24 thematically using framework analysis to better understand how parents use STEPS, how it  
25 works and key factors that could aid or hinder its effective implementation in routine clinical  
26 practice. **Ethics:** The application for ethical approval for the study was submitted to the  
27 North West - Liverpool Central Research Ethics Committee and received a favourable  
28 opinion on further information on 26 November 2021, reference number 21/NW/0319.  
29 **Dissemination:** The process evaluation aims to explore how a digital app might support  
30 parents in managing their child's behaviour. Implications for policy and research will be  
31 explored and the clinical implications of offering the app to a wider audience to address the  
32 lack of support to parents as highlighted in this paper. We plan to publish findings in  
33 international, peer-reviewed journals as well as present at conferences.  
34  
35  
36  
37  
38  
39  
40  
41  
42  
43  
44  
45  
46  
47  
48  
49

50  
51 Trial registration: The trial has been prospectively registered on 18 November 2021; ISRCTN  
52 8 16523503. <https://www.isrctn.com/ISRCTN16523503>.  
53  
54

55  
56  
57 **Keywords:** Process evaluation, ADHD, Conduct problems, Randomized Controlled Trial,  
58 Digital health, Parenting intervention  
59  
60

1  
2  
3  
4  
5 Strengths and Limitations of this study  
6

- 7 • Framework analysis allows for in-depth data analysis using a rigorous and transparent  
8 methodology.  
9
- 10 • Outcomes for quantitative data such as app usage metrics will be integrated with  
11 qualitative findings.  
12
- 13 • Inclusion of members from the OPTIMA patient and public involvement panel to  
14 advise on best practice in working with participants as well as assisting in data  
15 analysis and interpretation of the study results.  
16
- 17 • All eligible participants were invited to partake in interviews, including those who did  
18 not complete all timepoints and those who did not download or use the app, to further  
19 understand barriers to uptake and usage of the STEPS app.  
20
- 21 • A potential limitation of this study is the crossover of team members working on both  
22 the RCT and the process evaluation which may influence the interpretation of the  
23 qualitative data.  
24  
25  
26  
27  
28  
29  
30  
31  
32  
33  
34  
35  
36  
37  
38  
39  
40  
41  
42  
43  
44  
45  
46  
47  
48  
49  
50  
51  
52  
53  
54  
55  
56  
57  
58  
59  
60

## INTRODUCTION

Attention-deficit/hyperactivity disorder (ADHD) is a common neuro-developmental condition characterised by symptoms of inattention and/or impulsivity-hyperactivity (1). Children referred for ADHD assessment may also present with co-morbidities such as symptoms of conduct problems (2), which can negatively impact the family (3). The National Institute for Health and Care Excellence (NICE) recommends families should receive support as soon as possible after their referral, however, despite these recommendations, parents frequently endure long waiting times for diagnostic assessment and treatment. The average time between seeking help and receiving an ADHD diagnosis has been estimated as 18.3 months in the UK: the longest average interval compared to other European countries (4). Lengthy waiting times and scarcity of services are the most common barriers to accessing mental health services for children and adolescents as reported by parents (5). Furthermore, these waiting times are likely to get even longer, given consistent rises in the number of referrals to Child and Adolescent Mental Health Services (CAMHS) (6).

A robust body of research has established the efficacy of parent training as a psychosocial intervention for children and young people (7). Research has found that parent training may reduce conduct problems in children with ADHD (8). Moreover, Daley et al. (9) conducted a meta-analysis on behavioural interventions that established improvements in parenting quality as well as a reduction in child ADHD symptoms and conduct problems. However, despite evidence of its efficacy, parent training may not be made available until a diagnosis has been established, leaving parents without support during the lengthy waiting period which can have a detrimental effect on children and their families (10).

Considering evidence that parent training can have a positive outcome for both parent and child, and to provide families with much-needed timely and accessible support, we have developed a digital parenting application called Structured E-Parenting Support (STEPS). Research suggests that digital health interventions (DHIs), such as mobile apps, may have great potential to deliver large-scale, cost-effective support (11). However, there is a real need to understand how health and digital research can work together for effective implementation (12).

### **The STEPS app and OPTIMA trial**

STEPS has been designed to support parents of children with ADHD-type symptoms that are accompanied by challenging behaviour and who are awaiting clinical diagnostic assessment. Its structure, content and approach are described in Appendix A. STEPS draws inspiration from some of the principles underpinning the New Forest Parenting Program (NFPP) (13), an

established face-to-face parent program based on a long track record of research and clinical practice relating to parenting of child behaviour problems. However, its content, structure and approach, tailored to the digital delivery, are substantively different from the NFPP.

STEPS is delivered via a mobile app that aims to improve parents' understanding of their child's challenging behaviour and increase their perceived self-efficacy to manage such behaviours, as well as facilitate effective parent-child communication. STEPS has one preparatory module, "Introduction", followed by eight separate intervention modules (steps) to be followed in order. Each of the eight steps is designed to take about 20 minutes if completed in one go. The content is delivered via short, pre-recorded videos, audio clips and text, and parents can download resources as well as make notes on their own reflections within each of the modules (steps) (Table 1).

**Table 1.**

*The STEPS app modules' titles and aims.*

| MODULE Title              | Module Aim                                                                                                              |
|---------------------------|-------------------------------------------------------------------------------------------------------------------------|
| 1. Make a fresh start     | To encourage parents to see their child and themselves in a new, more positive way.                                     |
| 2. Look after yourself    | To emphasize the importance for parents to find time for themselves and to make links with other parents.               |
| 3. Get their cooperation  | To explain ways parents can communicate more effectively with their children                                            |
| 4. Build their confidence | To highlight the importance for parents to create situations in which they can praise their child                       |
| 5. Lead by example        | To help parents think of ways they can avoid losing their temper with their children when they are being difficult.     |
| 6. Guide & support them   | To show how parents can help their children navigate difficult situations where they may find themselves getting upset. |
| 7. Give them structure    | To demonstrate how vital it is that everyone signs up to and follows the house rules                                    |
| 8. Reducing conflict      | To explain how using rewards and sanctions can promote better behaviour in children.                                    |



1  
2  
3 In our previous study, parents rated the app's usability level as very high; the overall STEPS  
4 usability score on the System Usability Scale was 94.8 (SD 4.8) out of 100 (14). Moreover,  
5 feedback received was used to optimise the app in preparation for the trial. For example, we  
6 improved and simplified the registration process, improved video playback and added  
7 captions to videos. We also let parents know that study administrators would be on hand to  
8 help with any technical issues if the app visual download guide was insufficient. As part of  
9 the screening process, researchers checked whether parents had a phone with an operating  
10 system that was compatible with the app and were sufficiently proficient in English to be able  
11 to use the app and understand it.  
12  
13  
14  
15  
16  
17  
18  
19

20 The efficacy and cost-effectiveness of STEPS is currently being evaluated in the Online  
21 Parent Training for The Initial Management of ADHD referrals (OPTIMA) randomized  
22 controlled trial (14). Optima is a two-arm, superiority parallel randomised controlled trial  
23 with an internal pilot (15). Parents (n=352) are randomly assigned to either the intervention  
24 group (access to the STEPS app for 3 months) or the Wait as Usual comparison group  
25 (WAU) on completion of baseline measures. Randomisation will be carried out online via a  
26 secure platform provided by Sealed Envelope in a 1:1 ratio and stratification by trial centre  
27 location (London, Nottingham, Southampton) using random permuted blocks procedure with  
28 varying block sizes. The randomisation system will use a unique identifying number.  
29 Questionnaires are administered via Sealed Envelope, every three months at five timepoints.  
30 Participants are recruited from mental health services across London, Nottingham,  
31 Portsmouth, Southampton and Gloucester, after initial eligibility has been established via a  
32 positive screen for high levels of hyperactivity ( $\geq 8$ ) and conduct problems ( $\geq 4$ ) as measured  
33 by the Strengths and Difficulties Questionnaire (16). Participation in the study does not  
34 impact clinical care the family receives, or the time spent on the waitlist. There will be no  
35 restrictions on concomitant care, which will be monitored carefully during the trial through  
36 the child and adolescent service use questionnaire (17). Participant recruitment took place  
37 from May 2022 to July 2023.  
38  
39  
40  
41  
42  
43  
44  
45  
46  
47  
48  
49

50 The primary outcome of the OPTIMA trial is the severity of behaviour problems at 3 months  
51 post-randomisation compared to WAU care using parent-reported child behaviour problems  
52 measured with the eight-item ODD subscale of the Swanson Nolan and Pelham Rating Scale  
53 (SNAP-IV) (18). For the process evaluation, the mean difference between timepoint one and  
54  
55  
56  
57  
58  
59  
60

1  
2  
3 two of the primary outcome will be measured for the intervention arm only. Data relating to  
4 the study outcomes comparing the two groups will be published in separate papers.

### 6 **Process Evaluation Aims and Objectives**

8 Establishing a methodology by which the process evaluation will adhere to a priori is useful  
9 to ensure rigour and improve trial quality. Using Medical Research Council (MRC)  
10 guidelines (19) this protocol describes the method for the process evaluation of STEPS within  
11 the OPTIMA trial. Furthermore, the Standard Protocol Items: recommendations for  
12 interventional trials (SPIRIT) checklist has been utilised to provide evidence-based guidance  
13 in producing this protocol and is a widely accepted standard for trial protocols (20). Specific  
14 objectives are to:  
15  
16  
17  
18  
19

- 20  
21 1. To assess the i) reach ii) dose iii) fidelity iv) impact and v) context of the intervention.  
22 Table 2 defines the components of process evaluation and shows the methods by  
23 which the required information is gathered.
- 24  
25 2. To describe how parents implement STEPS.
- 26  
27 3. To explore parents' and clinicians' views concerning the value of STEPS and to  
28 describe this in the context of their respective needs.
- 29  
30 4. To explore external factors that may have acted as barriers to, or facilitators of,  
31 STEPS uptake and engagement.
- 32  
33 5. To consider the sustainability of the STEPS app beyond the trial and, if shown to be  
34 effective, the possible ways it could be incorporated into the clinical pathways.
- 35  
36 6. Evaluation of mechanisms of impact (mediating factors contributing to the outcome)  
37 and context (intrapersonal and environmental factors influencing app usage).  
38  
39  
40  
41  
42  
43  
44  
45  
46  
47  
48  
49  
50  
51  
52  
53  
54  
55  
56  
57  
58  
59  
60

**Table 2.***The STEPS Process evaluation components and methodology.*

|          | Description                                                                                                 | Data collected                                                                                                                                                          | Method of evaluation                                                                                                                                                                                                                                                                                                                                                                                                                        |
|----------|-------------------------------------------------------------------------------------------------------------|-------------------------------------------------------------------------------------------------------------------------------------------------------------------------|---------------------------------------------------------------------------------------------------------------------------------------------------------------------------------------------------------------------------------------------------------------------------------------------------------------------------------------------------------------------------------------------------------------------------------------------|
| Reach    | The extent to which the intervention reached the intended participants as outlined above in criteria        | Data capture via a secure web platform (SE) including age, ethnic origin, education and income of parents and age, gender and ethnicity of child collected at baseline. | Basic statistics including means, ranges and standard deviations. Attrition rates to be calculated at each timepoint.                                                                                                                                                                                                                                                                                                                       |
| Dose     | Level of intervention delivered and received                                                                | STEPS app data downloaded via the application developers Bitjam.                                                                                                        | STEPS usage data including time spent per STEP before moving on to the next one, time spent within each STEP and number of STEPS completed. Mean times, ranges and standard deviations will be calculated.                                                                                                                                                                                                                                  |
| Fidelity | Was the intervention delivered as intended including exploring adaptations or changes made during the study | Data from captured via a secure web platform (SE) on trial expectations.<br><br>Recordings and minutes from regular PPI panel meetings.                                 | Trial expectations collected at baseline as multiple choice and free text boxes.<br><br>PPI panel feedback on suggestions for change/adaptations.                                                                                                                                                                                                                                                                                           |
| Impact   | Did the intervention produce change? If so, how?                                                            | Parent and clinician interviews.<br><br>Quantitative data exploring changes in outcome measures (ODD) between timepoint 1 and 2.                                        | 30-45 minute parent interviews on the experiences of using the STEPS app including technology, engagement with the STEPS, effect on child behaviour and suggestions of adaptations to the app (see appendix B). Interviews with clinicians on any noticed effects on patients if applicable, barriers to use within the service and suggestions on effective implementation.<br><br>SNAP-IV ODD subscales measured at baseline and 3 months |
| Context  | External factors influencing change in parent and/or child behaviour and intervention uptake.               | Parent interviews exploring changes in child behaviour.                                                                                                                 | Interviews as above.                                                                                                                                                                                                                                                                                                                                                                                                                        |

Note. ODD=Oppositional Defiance Disorder; PPI=Patient and Public involvement; SE=Sealed Envelope; SNAP IV O (oppositional problems) (20,21)

1  
2  
3 Following MRC guidelines for process evaluations (19), a logic model has been  
4 developed (Table 3) to elucidate the mechanisms by which the STEPS intervention will  
5 produce an outcome and inform the framework of the qualitative analysis. A logic model  
6 can be useful in representing the theory of the intervention and its outcomes and helps to  
7 clarify the main aspects of the intervention as well as aid in data collection and analysis  
8 (21). The STEPS logic model clarifies the current issues in parent support for those  
9 waiting on a diagnosis for their child as well as expands on the implications for STEPS  
10 use beyond the study. Moreover, by providing a step-by-step process from developing the  
11 research question to understanding how outcomes were achieved, it ensures that  
12 researchers adhere to the pre-determined process of delivery and analysis.  
13  
14  
15  
16  
17  
18  
19  
20  
21  
22  
23  
24  
25  
26  
27  
28  
29  
30  
31  
32  
33  
34  
35  
36  
37  
38  
39  
40  
41  
42  
43  
44  
45  
46  
47  
48  
49  
50  
51  
52  
53  
54  
55  
56  
57  
58  
59  
60

**Table 3.***STEPS Logic Model*

| <b>Problem</b>                                                                                                                                                                                                                                                                                               | <b>Proposed Solution</b>                                                                                                                                                            | <b>Input and intervention</b>                                                                                                                                                                                                                                                                                                                                                                                                                                                                                                                                                                                                                            | <b>Mechanisms of impact</b>                                                                                                                                                                                                                                                                                                                         | <b>Intended outcomes</b>                                                                                                                                                                                                                                                                                                                                                                                                         | <b>Intended impact</b>                                                                                                                                                                                                                                                                                                                                                                                                                                                                                                                                                        |
|--------------------------------------------------------------------------------------------------------------------------------------------------------------------------------------------------------------------------------------------------------------------------------------------------------------|-------------------------------------------------------------------------------------------------------------------------------------------------------------------------------------|----------------------------------------------------------------------------------------------------------------------------------------------------------------------------------------------------------------------------------------------------------------------------------------------------------------------------------------------------------------------------------------------------------------------------------------------------------------------------------------------------------------------------------------------------------------------------------------------------------------------------------------------------------|-----------------------------------------------------------------------------------------------------------------------------------------------------------------------------------------------------------------------------------------------------------------------------------------------------------------------------------------------------|----------------------------------------------------------------------------------------------------------------------------------------------------------------------------------------------------------------------------------------------------------------------------------------------------------------------------------------------------------------------------------------------------------------------------------|-------------------------------------------------------------------------------------------------------------------------------------------------------------------------------------------------------------------------------------------------------------------------------------------------------------------------------------------------------------------------------------------------------------------------------------------------------------------------------------------------------------------------------------------------------------------------------|
| <p>ADHD is accompanied by Oppositional Defiant Disorder in up to 90% of referred cases.</p> <p>This is associated with child and parent distress and impairment which often drives referrals.</p> <p>Lengthy waiting times to receive assessment and diagnosis which can add to parent and child stress.</p> | <p>To provide low-intensity, unguided support for parents to help them better manage their children's challenging behaviour while they are awaiting formal clinical assessment.</p> | <p>Parents are screened via a secure hosting platform (MHE) or through local health services utilising the SDQ (<math>\geq 4</math> conduct problems and <math>\geq 8</math> attention and hyperactive problems).</p> <p>Access to STEPS is given post randomization to the intervention group (n=172) via research administrators and supported via text/email to download and utilise the app. The self-guided, parent training intervention, STEPS, is delivered via a mobile phone application.</p> <p>Parents work through 8 modules (steps) with content delivered via short videos and audio clips. Parents can download additional resources</p> | <p>STEPS draws on the evidence-based NFPP. It includes education about ADHD and uses behavioural techniques, including an emphasis on praise. The delivery of the intervention is underpinned by social learning theory.</p> <p>Modelling techniques are used to develop parenting skills (mastery) and to increase confidence (self-efficacy).</p> | <p>Increased parental understanding of ADHD and its impact on child behaviour.</p> <p>Increased knowledge of strategies to manage challenging child behaviour.</p> <p>Development of a positive parenting style.</p> <p>Improved parent-child communication</p> <p>Improved parental well-being and confidence in managing their child's oppositional behaviour. Reduced levels of oppositionality and defiance in children.</p> | <p>Improved support for parents while waiting on an assessment and diagnosis for their child.</p> <p>Cost-effective and time-efficient delivery of parent training, potentially reducing load on stretched child mental health services.</p> <p>Implementation of STEPS into the care pathway for children with symptoms of ADHD.</p> <p>Extension of parent training to more difficult-to-reach families and those too busy to attend training sessions.</p> <p>Engagement of a broader range of family members and key adults (e.g., fathers/grandparents/childminders)</p> |

1  
2  
3  
4  
5  
6  
7  
8  
9  
10  
11  
12  
13  
14  
15  
16  
17  
18  
19  
20  
21  
22  
23  
24  
25  
26  
27  
28  
29  
30  
31  
32  
33  
34  
35  
36  
37  
38  
39  
40  
41  
42  
43  
44  
45  
46

| Problem                                                                                                       | Proposed Solution | Input and intervention                                                                                                                                                                                                                                                                                                                                | Mechanisms of impact                                                                                                                                | Intended outcomes                                                                                                                   | Intended impact |
|---------------------------------------------------------------------------------------------------------------|-------------------|-------------------------------------------------------------------------------------------------------------------------------------------------------------------------------------------------------------------------------------------------------------------------------------------------------------------------------------------------------|-----------------------------------------------------------------------------------------------------------------------------------------------------|-------------------------------------------------------------------------------------------------------------------------------------|-----------------|
| Lack of parenting support during waiting times can further add to parent stress and unwanted child behaviour. |                   | <p>and are prompted to reflect on progress via written or audio notes.</p> <p>Engagement is encouraged through use of pre-recorded digital buddies.</p> <p>Parents receive text reminders to engage with the app, tips on app usage and encouragement on completion of a STEP. These are sent via automated text and emails from research admins.</p> | A range of pre-recorded scripts using digital buddies to describe scenarios allows parents to choose a family dynamic that feels relatable to them. | By using digital buddies parents feel less alone and more supported in their journey by being able to relate to their chosen buddy. |                 |

ADHD=Attention Deficit Hyperactive Disorder; MHE=myHealthe; NFPP=New Forest Parenting Program; SDQ=Strength and Difficulties Questionnaire; STEPS= Structured E-parenting support

## METHOD

### Design

This mixed-method process evaluation integrates qualitative and quantitative data. Qualitative data will be gathered from semi-structured interviews with parents and clinicians to explore the implementation of the intervention and the perceived impact of the intervention on parenting and child behaviour as well as expectations about the trial as reported by participants via free text responses on the trial questionnaires. Parallel to this, we will use quantitative data such as demographic data and app usage metrics. Table 2 describes the methods and evaluation of data collection.

### Qualitative data collection

Qualitative data collection will include semi-structured interviews with parents and clinicians and text gathered from Sealed Envelope asking parents about their trial expectations.

### Parent Interviews

Participants who meet the following criteria will be invited to interview; i) have consented to be contacted for interviews via the study consent form (optional consent statement), ii) have been randomised to the STEPS arm. Participants will be invited to take part in interviews irrespective of whether they engaged with the STEPS app or not. Views of participants who have not completed any of the steps are very important in the context of understanding barriers to usage. We aim to recruit n=50 parents for interviews.

Participants who have consented to be contacted about interviews will be approached by a researcher other than the one who has enrolled them on the trial to avoid unblinding.

Selection and allocation of eligible participants is completed by the trial manager and trial administrators. Researchers invite participants via email explaining the interview process.

The default method for conducting interviews will be a video/phone call (30-45 minutes duration). Participants who wish to complete the interview via email will be sent an adapted interview schedule. Offering a range of ways to engage in the interviews will ensure that those who feel unable to speak with a researcher on the phone will also be able to take part to give a breadth of views from parents.

The interview schedule has been developed by a team of experienced qualitative researchers in collaboration with the OPTIMA Patient and Public Involvement group (PPI). Once the team had finalised the interview schedule, the three researchers involved in conducting the

1  
2  
3 interviews, piloted the interviews with members from the PPI group and colleagues. Initially  
4 up to an hour had been allocated for the interviews but the pilot showed that 30-45 was  
5 adequate time to cover all the questions. Furthermore, the PPI group felt that a decrease in the  
6 time required from the parents was more commensurate with the compensation for  
7 participation, a £20 Amazon gift voucher. The interview schedules remained dynamic and in  
8 the early stage of interviewing, the qualitative team worked together to adapt and add  
9 questions.  
10  
11  
12  
13  
14  
15  
16

17 Questions explore the technical experience of downloading and using the app, views on  
18 content and features of the app, such as the STEPS buddies, and feedback on if/how the app  
19 influenced aspects of parenting and child behaviour management. They will also ask  
20 participants about their thoughts on the effectiveness of STEPS in reducing their child's  
21 behavioural challenges and, if applicable, the perceived mechanisms by which STEPS is  
22 effective (see appendix B for full interview schedule). Interviews with parents took place  
23 between October 2022 and November 2023. All parents who were recruited into the  
24 intervention arm were invited to take part in interviews whether they had downloaded the app  
25 or not. Invitations went out three months after randomization, ensuring parents had the full  
26 three-month usage period of the app. All de-identified transcripts and email responses will be  
27 stored in electronic form on a KCL OneDrive for Business and SharePoint location. The  
28 original recordings or emails will be deleted from OneDrive for Business after transcription.  
29  
30  
31  
32  
33  
34  
35  
36  
37  
38

### 39 **Clinician Interviews**

40 Clinicians form no active part in the OPTIMA RCT with the study being independent of any  
41 clinical input from CAMHS or other healthcare providers. Parents must be on a current wait  
42 list for their child to take part in OPTIMA and clinics have been informed of the nature of the  
43 OPTIMA RCT. It is therefore important to gain clinical perspectives to effectively evaluate  
44 the STEPS app in terms of future directions and implementation. Managers in the clinical  
45 services that have supported OPTIMA RCT recruitment will be approached with a request to  
46 circulate the clinician information sheet to members of the team. Clinicians interested in  
47 taking part are asked to contact the team directly. The clinicians who are interviewed have no  
48 active involvement in the trial, the STEPS intervention or the collection of outcome data.  
49 Some participants may disclose their use of the STEPS app but the clinician is not asked to  
50 probe for this. The purpose of the interviews with clinicians is to get their views about the  
51  
52  
53  
54  
55  
56  
57  
58  
59  
60



1  
2  
3 impact of STEPS, potential factors influencing parent engagement and perceived barriers to  
4 effectiveness with the aim of facilitating implementation into clinical services.  
5  
6  
7

8 Clinician interviews can help add depth to the qualitative data in terms of understanding the  
9 clinical context in relation to any outcomes shared by parents in terms of contact with  
10 services or receiving an assessment and/or diagnosis. Our aim is to include n=10 interviews  
11 from clinicians to give adequate representation across the three sites although if more  
12 clinicians come forward to be interviewed they will be able to partake. Clinicians will all be  
13 interviewed via phone/video call and data stored as per the participants' data above. There is  
14 no incentive for clinicians to take part.  
15  
16  
17  
18  
19

### 20 **Quantitative data collection**

21  
22 To establish intervention adherence, the number of completed STEPS modules will be  
23 measured (min = 0; max = 8), with completion of two modules constituting adherence to the  
24 intervention. Other collected app usage events will include: the number of started modules,  
25 the number of videos watched, the time spent watching videos (in seconds), the number of  
26 audio clips listened to and the time spent listening to audio clips (in seconds), the number of  
27 reflections recorded, the number of items saved to favourites, and the number of accessed text  
28 resources. These will be used to provide descriptive information about app usage patterns.  
29 To determine the intervention's reach, the process evaluation will use data collected from  
30 parents at baseline (pre-randomisation) via Sealed Envelope, including demographic data  
31 about the parent, such as parent's gender, parent ethnicity, parental education, parent  
32 employment status, parent relationship status and family socioeconomic status based on total  
33 household income as well as child's age, sex and ethnicity. To describe the severity of  
34 oppositional and defiant disorder symptoms and hyperactivity/impulsivity and inattention  
35 symptoms in the sample, the respective subscales from the parent-completed SNAP  
36 questionnaire will be used (22,23). The 8 items of the SNAP-IV ODD subscale have  
37 excellent internal consistency ( $\alpha=0.93$ ) and has been shown to be sensitive to change in  
38 clinical trials (24). Furthermore, given that ADHD and ASD often co-occur, parent-rated  
39 scores for the Social Communication Questionnaire-Lifetime (SCQ-L) will be included (25).  
40 The SCQ-L, used in this study to characterise the sample of participants receiving the  
41 intervention, has been found to have good internal consistency (Cronbach  $\alpha=0.82$ ). A cutoff  
42  $\Rightarrow 15$  differentiated young people with a clinical diagnosis of ASD from those without ASD  
43 (sensitivity = 0.70 and specificity = 0.67) (26). At baseline, parents are asked about their trial  
44  
45  
46  
47  
48  
49  
50  
51  
52  
53  
54  
55  
56  
57  
58  
59  
60

1  
2  
3 expectations. Parents are also asked about previous engagement in parent training (yes/no  
4 answer), expectations of receiving parent training (strongly disagree to strongly agree), and  
5 expectations of the STEPS app (strongly disagree to strongly agree).  
6  
7  
8  
9

## 10 **DATA ANALYSIS**

### 11 **Qualitative data analysis**

12  
13  
14  
15 Our objectives are to explore the reach, dose, fidelity, impact and context of the intervention.  
16 Qualitative analysis will use a framework approach (27), utilising NVivo version 14,  
17 complemented by quantitative analysis. Framework analysis sits within the broader  
18 qualitative methodology of thematic analysis and allows researchers to compare data across  
19 cases as well as within cases, ensuring the individual's view is retained (27). Framework  
20 analysis is a flexible but rigorous method used in health research to integrate qualitative data  
21 from different informants and sources. It uses inductive or deductive approaches to identify,  
22 describe and interpret patterns (28). Three researchers will take part in both interviewing,  
23 transcribing and analysing transcripts with two senior members of the research team taking  
24 part in verifying a selection of transcripts. PPI members will work with the research team  
25 during the interpretation and verification stages of analysis. Specifically, PPI members will  
26 individually review a selection of transcripts to verify the researchers' interpretation of the  
27 data and also take part in group meetings to discuss codes and meanings. Although several  
28 members of the PPI team have prior experience in qualitative research, 2-3 hours of training  
29 on the introduction to qualitative research and how to read and code transcripts will be  
30 provided by the research team. Finally, the analysis will be overseen by experts in framework  
31 analysis and regular meetings between the researchers analysing the transcripts and the larger  
32 qualitative team, will ensure fidelity and cohesiveness in the coding process. The team will  
33 start by identifying a coding framework that aligns with the objectives of the study. Creating  
34 a data set, researchers will map out the codes and start looking for themes and relationships in  
35 the data set. As data moves from codes to themes, the original research questions as well as  
36 existing literature will be referred to and discussed and reviewed within the multidisciplinary  
37 team to ensure transparency and avoid bias. The method is appropriate for incorporating data  
38 from semi-structured interviews, PPI panel discussions and free text box data from  
39 questionnaires.  
40  
41  
42  
43  
44  
45  
46  
47  
48  
49  
50  
51  
52  
53  
54  
55  
56  
57  
58  
59  
60

### 60 **Quantitative data analysis**

1  
2  
3 Descriptive data on the study sample will be presented to include means, SD, medians,  
4 ranges, n values and percentages. Quantitative data measuring changes in oppositional  
5 behaviour (SNAP-IV ODD) between baseline and 3 months and making within-group  
6 comparisons will also help to assess the impact of the app.  
7  
8  
9

### 10 **Data integration**

11 The qualitative data extracted from interviews with parents and clinicians as well as text box  
12 data exploring parents' expectations from the study will provide the main source of data to  
13 explore the aims and objectives of the process evaluation. Alongside this descriptive data  
14 from the online questionnaires will be used, both to provide context to the qualitative data in  
15 terms of demographics, but also to help refine the themes emerging from the qualitative data  
16 analysis. Mixed methods afford multiple perspectives and seek to converge the findings (29).  
17 Researchers will analyse the data synchronously and integrate the outcomes from the  
18 different datasets to provide a holistic overview of the results.  
19  
20  
21  
22  
23  
24

### 25 **Patient and Public Involvement (PPI)**

26 The OPTIMA RCT and STEPS app were developed in conjunction with an advisory board  
27 made up of parents of children with neurodevelopmental disorders including ADHD. The PPI  
28 group was established early on in the overall OPTIMA programme of research prior to the  
29 RCT taking place. The group advised the team about how the design and functionality of the  
30 app could be optimised as part of the panel group discussions as well as individually in the  
31 usability study (14). This was implemented and piloted before the RCT. The PPI group also  
32 supported the team in ensuring that the trial procedures were acceptable to the participants  
33 and that any participant-facing documents were written in clear and accessible language.  
34 Finally, they also helped with the development of the schedules for the parent interviews.  
35 In addition to regular PPI panel meetings throughout the study period, panel members  
36 advised on subjects such as how to most effectively communicate with parents, suggestions  
37 of how best to reward parents for their time in the study and other study questions. Further,  
38 members will be involved in the data analysis process, reading transcripts and taking part in  
39 meetings to discuss codes and meanings with OPTIMA researchers.  
40  
41  
42  
43  
44  
45  
46  
47  
48  
49  
50

### 51 **Ethics and Dissemination**

52 All participants in the study consented to take part via e-consent on Sealed Envelope after  
53 having received written and oral information about the study including a brief participant  
54 information sheet (PIS) with condensed information in an easy-to-understand format and as  
55 well as a full PIS for their reference. All parents received a counter-signed, by the researcher,  
56 copy of their consent form. The study received ethical approval from the North West -  
57  
58  
59  
60

1  
2  
3 Liverpool Central Research Ethics Committee on 26 November 2021, reference number  
4 21/NW/0319. Findings will be published in open-access, peer-reviewed scientific journals as  
5 well as be presented at conferences.  
6  
7

## 8 **DISCUSSION**

9  
10 STEPS is a digital, self-guided app that is currently being evaluated in the OPTIMA RCT  
11 (15). To better understand the study outcomes and contextual factors influencing these, we  
12 are conducting a process evaluation using qualitative and quantitative data gathered from  
13 parents, clinicians, app usage and demographic data. We expect the results to allow us to  
14 understand how the app has worked, such as if it worked as intended, with the aim of  
15 understanding the implications of the potential wider use of STEPS, especially within a  
16 clinical setting. In understanding the strengths and weaknesses of the intervention, how the  
17 intervention was delivered and whether the intended audience received the intervention and  
18 how the app can be further developed and improved to attain its intended purpose, we aim to  
19 provide a cost-effective and self-guided support to parents awaiting clinical assessment  
20 and/or diagnosis for their child.  
21  
22

23  
24 Research suggests that DHIs may have great potential to deliver large-scale, cost-effective  
25 support (11). The STEPS app may be able to bridge the gap between lengthy waiting times  
26 for a diagnosis of ADHD and the strains of managing difficult child behaviour. Furthermore,  
27 the study will contribute to a body of research that aims to understand how digital  
28 interventions work and the factors that contribute to their efficacy, with the aim of improving  
29 and understanding the practical implication of using STEPS as a viable DHI to be accessed  
30 by a wider population.  
31  
32

### 33 **Strength and limitations**

34  
35 Integrating qualitative and quantitative data provides a comprehensive evaluation of the way  
36 in which the intervention has worked. Capturing the lived experience of parents through  
37 interviews will give valuable insight into both the mechanics of how the app works as well as  
38 the impact on parenting and child behaviour. The data from the app provide detailed  
39 measures of how the app was used by participants and will help to better understand how the  
40 app was utilised (e.g., the number of times app was used or the length of time per each app  
41 use). Some caution must be exercised when analysing these data in terms of potential errors  
42 such as parents opening the app but not actually using it.  
43  
44

45  
46 Limitations in terms of breadth of participant involvement may occur, for example,  
47 participants who do not engage with the study may be less likely to respond to invites to take  
48 part in interviews. Participants' interview invites clearly state that the researchers are  
49  
50  
51  
52  
53  
54  
55  
56  
57  
58  
59  
60

1  
2  
3 interested in all views, including those who did not engage with the STEPS app to ensure as  
4 wide reach as possible is attained.

5  
6 Interviews with clinicians may provide limited data as many parents in the study will not yet  
7 have been assessed, even after completing the final 12-month timepoint, meaning clinicians  
8 may have limited feedback/views from the parents regarding the app.  
9

## 10 11 **Conclusion**

12  
13 Process evaluations are an essential part of evaluating complex interventions to understand  
14 the potential causal mechanisms within the study. Within research, transparency of  
15 implementation and rigour and validity throughout the trial is essential. A process evaluation  
16 can further the understanding of the mechanisms by which an intervention is successful and  
17 for whom it is successful and in what circumstances. Preparing a protocol prior to the  
18 process evaluation taking place will further ensure that the planned methodology is adhered  
19 to, adding to the validity of the process evaluation. Furthermore, a process evaluation may  
20 establish fidelity and quality of the implementation and mechanisms of change and help to  
21 understand the context in which the intervention is effective (30).  
22  
23  
24  
25  
26  
27  
28  
29

## 30 31 **Acknowledgements**

32 Thank you to Cathy Laver-Bradbury for providing advice on the STEPS concept  
33 and content. Special thanks go to Catherine Thompson for her work on an earlier prototype—  
34 New Forest On-Line. The authors would like to acknowledge and thank the expert members  
35 of the PPI panel. The views expressed are those of the authors and not necessarily those of  
36 the NHS, the NIHR or the Department of Health and Social Care.  
37  
38  
39  
40  
41

## 42 43 **Authors' contributions**

44 ESB led the overall conception and design of the study and is the overall OPTIMA Chief  
45 Investigator. EH, KKA and ESB led the drafting of this manuscript. KKA is responsible for  
46 coordinating the study. BF and EH are responsible for enrolling participants and  
47 administering outcome measures and coordinating recruitment. EH and NL are responsible  
48 for participant interviews, transcription and qualitative data analysis. NL provides administrative  
49 support for the project and for the patient and public involvement activities. CH, HK and CG  
50 contributed to the conception and design of the study. HK and CG had overall responsibility  
51 for qualitative data analysis. All authors have read and approved the final version of this  
52 manuscript.  
53  
54  
55  
56  
57  
58  
59  
60

## **Funding**

This project is funded by the National Institute for Health Research (NIHR) Programme Grants for Applied Research (RP-PG-0618-20003). The views expressed are those of the authors and not necessarily those of the NIHR or the Department of Health and Social Care. The funding body played no role in the study design and conduct. This work was also supported in part by the NIHR Maudsley Biomedical Research Centre at South London and Maudsley National Health Service Foundation Trust and King's College London to ESB.

## **Competing interests**

STEPS concepts and content were designed by ESB together with other members of the OPTIMA team. STEPS visual design and digital implementation were completed by TOAD with funding provided to ESB by the South London & Maudsley NHS Trust. Videos were produced by Eye Witness Productions Ltd. funded by Solent NHS Trust. ESB has received speaker fees, consultancy or research funding from Takeda, Neurotech Solutions, QBtech and Medice. He has received royalties from the New Forest Parenting Programme.

**REFERENCES**

1. Dalrymple RA, Maxwell LM, Russell S, Duthie J. NICE guideline review: Attention deficit hyperactivity disorder: diagnosis and management (NG87). *Archives of disease in childhood-education and practice*. 2020 Oct 1;105(5):289-93.
2. Jensen PS, Martin D, Cantwell DP. Comorbidity in ADHD: Implications for research, practice, and DSM-V. *Journal of the American Academy of Child & Adolescent Psychiatry*. 1997 Aug 1;36(8):1065-79.
3. Theule J, Wiener J, Tannock R, Jenkins JM. Parenting stress in families of children with ADHD: A meta-analysis. *Journal of emotional and behavioral disorders*. 2013 Mar;21(1):3-17.
4. Fridman M, Banaschewski T, Sikirica V, Quintero J, Chen KS. Access to diagnosis, treatment, and supportive services among pharmacotherapy-treated children/adolescents with ADHD in Europe: data from the Caregiver Perspective on Pediatric ADHD survey. *Neuropsychiatric disease and treatment*. 2017 Mar 30:947-58.
5. Reardon T, Harvey K, Baranowska M, O'brien D, Smith L, Creswell C. What do parents perceive are the barriers and facilitators to accessing psychological treatment for mental health problems in children and adolescents? A systematic review of qualitative and quantitative studies. *European child & adolescent psychiatry*. 2017 Jun;26:623-47.
6. Ball WP, Black C, Gordon S, Ostrovska B, Paranjothy S, Rasalam A, Ritchie D, Rowlands H, Rzewuska M, Thompson E, Wilde K. Inequalities in children's mental health care: analysis of routinely collected data on prescribing and referrals to secondary care. *BMC psychiatry*. 2023 Dec;23(1):1-8.
7. Garbacz LL, Brown DM, Spee GA, Polo AJ, Budd KS. Establishing treatment fidelity in evidence-based parent training programs for externalizing disorders in children and adolescents. *Clinical Child and Family Psychology Review*. 2014 Sep;17:230-47.
8. Hartman RR, Stage SA, Webster-Stratton C. A growth curve analysis of parent training outcomes: Examining the influence of child risk factors (inattention, impulsivity, and hyperactivity problems), parental and family risk factors. *Journal of child psychology and psychiatry*. 2003 Mar;44(3):388-98.

- 1  
2  
3 9. Daley D, Van der Oord S, Ferrin M, Danckaerts M, Doepfner M, Cortese S, Sonuga-  
4 Barke EJ, European ADHD Guidelines Group. Behavioral interventions in attention-  
5 deficit/hyperactivity disorder: a meta-analysis of randomized controlled trials across  
6 multiple outcome domains. *Journal of the American Academy of Child & Adolescent*  
7 *Psychiatry*. 2014 Aug 1;53(8):835-47.  
8  
9
- 10  
11 10. Gullhav AN, Skomsvoll JF, Heimstad R, Schultz JS. Reducing waiting times from 65  
12 to under 40 days for children and adolescents receiving mental health services using a  
13 new scheduling policy. *Health Services Management Research*. 2022 Aug  
14 31:09514848221122895.  
15  
16
- 17  
18 11. Murray E, Hekler EB, Andersson G, Collins LM, Doherty A, Hollis C, Rivera DE,  
19 West R, Wyatt JC. Evaluating digital health interventions: key questions and  
20 approaches. *American journal of preventive medicine*. 2016 Nov 1;51(5):843-51.  
21  
22
- 23  
24 12. Duffy A, Christie GJ, Moreno S. The challenges toward real-world implementation of  
25 digital health design approaches: narrative review. *JMIR Human Factors*. 2022 Sep  
26 9;9(3):e35693.  
27  
28
- 29  
30 13. Sonuga-Barke EJ, Thompson M, Abikoff H, Klein R, Brotman LM.  
31 Nonpharmacological interventions for preschoolers with ADHD: The case for  
32 specialized parent training. *Infants & Young Children*. 2006 Apr 1;19(2):142-53.  
33  
34
- 35  
36 14. Kostyrka-Allchorne K, Chu P, Ballard C, Lean N, French B, Hedstrom E, Byford S,  
37 Cortese S, Daley D, Downs J, Glazebrook C, Goldsmith K, Hall C, Kovshoff H,  
38 Kreppner J, Sayal K, Shearer J, Simonoff E, Thompson M, Sonuga-Barke E  
39 Remote Recruitment Strategy and Structured E-Parenting Support (STEPS) App:  
40 Feasibility and Usability Study *JMIR Pediatr Parent* 2023;6:e47035 URL:  
41 <https://pediatrics.jmir.org/2023/1/e47035>. DOI: 10.2196/47035  
42  
43
- 44  
45 15. Kostyrka-Allchorne K, Ballard C, Byford S, Cortese S, Daley D, Downs J, French B,  
46 Glazebrook C, Goldsmith K, Hall CL, Hedstrom E. Online Parent Training for The  
47 Initial Management of ADHD referrals (OPTIMA): the protocol for a randomised  
48 controlled trial of a digital parenting intervention implemented to support parents and  
49 children on a treatment waitlist. *Trials*. 2022 Dec 12;23(1):1003.  
50  
51
- 52  
53 16. Goodman R. The Strengths and Difficulties Questionnaire: a research note. *Journal of*  
54 *child psychology and psychiatry*. 1997 Jul;38(5):581-6.  
55  
56  
57  
58  
59  
60



17. Barrett, B., Byford, S., Sharac, J., Hudry, K., Leadbitter, K., Temple, K., . . . consortium, P. (2012). Service and wider societal costs of very young children with autism in the UK. *Journal of autism and developmental disorders*, 42(5), 797-804.
18. Swanson JM, Kraemer HC, Hinshaw SP, Arnold LE, Conners CK, Abikoff HB, Clevenger W, Davies M, Elliott GR, Greenhill LL, Hechtman L. Clinical relevance of the primary findings of the MTA: success rates based on severity of ADHD and ODD symptoms at the end of treatment. *Journal of the American Academy of Child & Adolescent Psychiatry*. 2001 Feb 1;40(2):168-79.
19. Moore GF, Audrey S, Barker M, Bond L, Bonell C, Hardeman W, Moore L, O’Cathain A, Tinati T, Wight D, Baird J. Process evaluation of complex interventions: Medical Research Council guidance. *bmj*. 2015 Mar 19;350.
20. Chan AW, Tetzlaff JM, Altman DG, Laupacis A, Gøtzsche PC, Krleža-Jerić K, Hróbjartsson A, Mann H, Dickersin K, Berlin JA, Doré CJ. SPIRIT 2013 statement: defining standard protocol items for clinical trials. *Annals of internal medicine*. 2013 Feb 5;158(3):200-7.
21. Morgan trimmer et al. Creating a logic model for an intervention: evaluation in health and wellbeing (internet). (2018, August 07). Available from <https://www.gov.uk/guidance/evaluation-in-health-and-wellbeing-creating-a-logic-model>
22. Swanson JM. The SNAP Rating Scale for the Diagnosis of the Attention Deficit Disorder.
23. Swanson JM. School-based assessments and interventions for ADD students. KC publishing; 1992.
24. Johnson, M., Gillberg, C., Vinsa, I., Fransson, G., Samuelsson, L., Jakobsson, K., Östlund, S., Fernell, E. and Gillberg, C., 2023. A randomized controlled trial of a new intervention in early symptomatic syndromes eliciting neurodevelopmental clinical examinations: PR-ESSENCE. *European Child & Adolescent Psychiatry*, 32(1), pp.63-74.
25. Rutter M. Social communication questionnaire. (No Title). 2003.
26. Ung, D., Johnco, C., McBride, N.M., Howie, F., Scalli, L. and Storch, E.A., 2016. Optimizing the screening of autism spectrum disorders in outpatient clinics: An examination of the Social Communication Questionnaire-Lifetime. *Research in Autism Spectrum Disorders*, 27, pp.21-28.

- 1  
2  
3 27. Gale NK, Heath G, Cameron E, Rashid S, Redwood S. Using the framework method  
4 for the analysis of qualitative data in multi-disciplinary health research. *BMC medical*  
5 *research methodology*. 2013 Dec;13(1):1-8.  
6  
7  
8 28. Goldsmith, L. J. (2021). Using framework analysis in applied qualitative  
9 research. *The Qualitative Report*, 26(6), 2061-2076.  
10 doi:<https://doi.org/10.46743/2160-3715/2021.5011>  
11  
12 29. Almeida F. Strategies to perform a mixed methods study. *European Journal of*  
13 *Education Studies*. 2018 Aug 30.  
14  
15 30. Skivington K, Matthews L, Simpson SA, Craig P, Baird J, Blazeby JM, Boyd KA,  
16 Craig N, French DP, McIntosh E, Petticrew M. A new framework for developing and  
17 evaluating complex interventions: update of Medical Research Council guidance.  
18 *bmj*. 2021 Sep 30;374.  
19  
20  
21  
22  
23  
24  
25  
26  
27  
28  
29  
30  
31  
32  
33  
34  
35  
36  
37  
38  
39  
40  
41  
42  
43  
44  
45  
46  
47  
48  
49  
50  
51  
52  
53  
54  
55  
56  
57  
58  
59  
60

## Structured E-Parenting Support (STEPS)

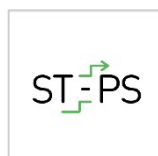

### What is STEPS?

STEPS is a parenting support intervention delivered in the form of a digital application (app).

### What is STEPS aiming to do?

STEPS has been designed to decrease conflict in the family by reducing levels of children's oppositionality and defiance. It helps parents to be more effective and self-confident in managing these problems. It is designed to be particularly helpful for the parents of children who are temperamentally more difficult to manage, such as those with attentional and impulse control problems. It is aimed at supporting parents of primary school-aged children.

### How was STEPS developed?

STEPS is evidence based. Inspired by the New Forest Parenting Programme, a face-to-face parent training intervention, its content has been shaped by the latest research about parenting and child behaviour as well as many years of clinical experience.

### How is STEPS implemented?

STEPS can be accessed through a variety of devices. Parents can move through the content (steps) at their own pace and at any time of day. The order of the steps is fixed (see 'How is STEPS structured?'), although there is a degree of choice within each step. STEPS is an unguided intervention, which means there is no personal clinical support for parents progressing through STEPS. The content is delivered mainly using short videos and audio clips. During onboarding each parent will register with the app and choose one of four 'buddies' – a parent character played by an actor, who will accompany them on their STEPS journey.

### How is STEPS structured?

STEPS has two preparatory modules, "onboarding" and "introduction", followed by eight separate intervention modules (steps). These steps must be followed in order.

### What are the eight steps?

1. **Make a fresh start** – Encourages parents to see their child and themselves in a new, more positive way.
2. **Look after yourself** – Emphasizes how important it is for parents to find time for themselves and to make links with other parents.
3. **Get co-operation** – Explains ways parents can communicate more effectively with their children.
4. **Build confidence** – Highlights how important it is for parents to create situations in which they can praise their child.
5. **Keep it cool** – Helps parents to think of ways they can avoid losing their temper with their children when they are being difficult.
6. **Guide & support** – Shows how parents can help their children navigate around difficult situations where they may find themselves getting upset.

7. **Structure & boundaries you can trust** – Demonstrates how vital it is that everyone signs up to and follows the house rules.
8. **Reduce conflict and improve behaviour** – Explains how using rewards and sanctions can promote better behaviour in children.

### What elements are included in the steps?

Each step has a similar structure and includes the following common elements:

- i) **Aims:** sets out the themes to be covered in a step presented by Buddy.
- ii) **Science:** provides a short and easy to understand video-description of the evidence behind a step's message presented by a real-life expert.
- iii) **Examples:** videos of parents (played by actors) discussing their parenting experiences.
- iv) **Skills:** audio presentations of specific skills in simple short sentences accompanied by graphical illustrations.
- v) **Reflections:** a chance for parents to write or talk about their experiences.
- vi) **Resources:** downloadable aides and guides relating to each step.

### How long will STEPS take to complete?

This will depend on the pace and frequency of usage. However, each of the 8 steps are designed to take about 20 minutes if completed in one go.

### How will engagement be encouraged?

The app has an attractive design and is easy to use. The use of buddies and pre-recorded prompts automatically sent to parents' devices will help maintain engagement and remind users to reconnect (see table 1).

### What happens if parents are having difficulty?

There will be support for parents encountering technical difficulties. For any serious clinical concerns, parents will be provided with contact details for the clinical service to whom they were referred as well as direct contact details for crisis services.

### What information will be recorded?

Each parent will be assigned a unique ID, which will be used to link app usage data with the offline study information. Usage data including the number of steps, elements completed, the amount of time parents were engaged with the app and the time of day the app was accessed will be collected.

### Who created STEPS?

STEPS concepts and content was designed by Edmund Sonuga-Barke, David Daley, Johnny Downs, Hanna Kovshoff, Jana Kreppner and Margaret Thompson with Samuele Cortese and Cathy Laver-Bradbury providing advice. STEPS visual design and digital implementation was completed by TOAD with funding provided to Sonuga-Barke by the South London & Maudsley NHS Trust. Videos were produced by Eye Witness Productions Ltd. funded by Solent NHS Trust. Special thanks go to Catherine Thompson for her work on an earlier prototype – *New Forest On-Line*.

**Table 1. All prompts sent to app users (grey fill – messages sent via the app; white fill – messages sent via the team).**

| When?           | Seven days from randomisation                                                                                                                                                                                                                                                                      | One day after download                                                                                                                     | One week after download                                                                                                  | One day after completing Step 1                                                                                                                                            | One week after completing Step 1                                                                                                                                                                                                                                                                                                         | Seven days from last activity                                                                                                              | Two months to go                                                           | After about 6 weeks from download (half-way through access period)                                                                                                                                                                                                                               | One month to go                                                                                                 | One week to go                                                                                                 |
|-----------------|----------------------------------------------------------------------------------------------------------------------------------------------------------------------------------------------------------------------------------------------------------------------------------------------------|--------------------------------------------------------------------------------------------------------------------------------------------|--------------------------------------------------------------------------------------------------------------------------|----------------------------------------------------------------------------------------------------------------------------------------------------------------------------|------------------------------------------------------------------------------------------------------------------------------------------------------------------------------------------------------------------------------------------------------------------------------------------------------------------------------------------|--------------------------------------------------------------------------------------------------------------------------------------------|----------------------------------------------------------------------------|--------------------------------------------------------------------------------------------------------------------------------------------------------------------------------------------------------------------------------------------------------------------------------------------------|-----------------------------------------------------------------------------------------------------------------|----------------------------------------------------------------------------------------------------------------|
| What?           | Hi [Name]<br><br>Thanks for taking part in OPTIMA. We noticed that you haven't downloaded the STEPS app yet. It is available via the App Store [link] or Google Play [link]<br><br>If you are having any problems, please reply to this message and we will contact you as soon as we can to help. | Thanks for downloading the STEPS app.<br><br>Just using it for a few minutes a day can be very useful.<br><br>We hope you find it helpful. | STEPS TIP: All reflections recorded within the app remain completely private to you and will not be seen by anyone else. | Well done for completing Step 1. Step 2 is all about looking after yourself and includes tips from other parents on finding 'me time'.<br><br>Click here to have a go now. | Hi [Name]<br><br>Well done for completing Step 1. Step 2 is all about looking after yourself and includes tips from other parents on finding 'me time'.<br><br>Click here to have a go now.<br><br>If you are unsure how to do it or need any help with the app, please reply to this message and we will contact you as soon as we can. | STEPS TIP: When finding time to complete a whole step in one go is tricky, breaking it down into small 'bite-sized' chunks can be helpful. | STEPS UPDATE: You have 2 months left to go on STEPS. Use it while you can. | Hi [name]<br><br>Thanks for taking part in OPTIMA. It's great to see that you downloaded STEPS. Just dip in and out when you can, at your own pace.<br><br>If you are unsure how to do it or need any help with the app, please reply to this message and we will contact you as soon as we can. | STEPS UPDATE: You have 1 month left to go on STEPS. There is still time for you to get a lot of out of the app. | STEPS UPDATE: You have 1 week left to go on STEPS. There is still time for you to get a lot of out of the app. |
| How?            | From the research team                                                                                                                                                                                                                                                                             | Via the app                                                                                                                                | Via the app                                                                                                              | Via the app                                                                                                                                                                | From the research team                                                                                                                                                                                                                                                                                                                   | Via the app                                                                                                                                | Via the app                                                                | From the research team                                                                                                                                                                                                                                                                           | Via the app                                                                                                     | Via the app                                                                                                    |
| How many times? | Two/three times                                                                                                                                                                                                                                                                                    | Once                                                                                                                                       | Once                                                                                                                     | Once                                                                                                                                                                       | Once                                                                                                                                                                                                                                                                                                                                     | Twice                                                                                                                                      | Once                                                                       | Once                                                                                                                                                                                                                                                                                             | Once                                                                                                            | Once                                                                                                           |
| Conditional?    | Yes, has not downloaded the app                                                                                                                                                                                                                                                                    | No                                                                                                                                         | No                                                                                                                       | Yes, has not started Step 2.                                                                                                                                               | Yes, has not started Step 2.                                                                                                                                                                                                                                                                                                             | Yes, has not completed the whole app.                                                                                                      | No                                                                         | Yes, downloaded the app but not using it.                                                                                                                                                                                                                                                        | No                                                                                                              | No                                                                                                             |

## PARENT INTERVIEW SCHEDULE

### Preamble

- Check that the interviewee has received the information sheet, has initialled the box stating they are happy to be contacted for an interview on consent form, understands the OPTIMA trial project and his/her role in it.
  
- Explain that:
  - The aim of the OPTIMA study is to investigate whether a digital parent education programme, STEPS, can help parents to become more confident and effective in managing their children's difficult behaviour.
  - The research team is talking to some of the parents who are taking part in the study to see how they feel about participating in the trial and using the STEPS app.
  - We are interested in individual experiences and thoughts about STEPS, so please give honest responses, as both positive and negative feedback will help us improve the intervention.
  - We will ask questions relating to your expectations of STEPS, its impact on your parenting and on your child.
  - We will combine all our interview responses so that we can provide an overall picture of parents' views about STEPS. Any comments in the study report are attributed very generally, for example, "A parent commented that..." All comments/opinions will be strictly confidential.

Ask: Do you have any initial questions about the project?

### **Ethics**

- The interview will take about 30-45 minutes
- You do not have to answer any questions that you are not comfortable with and there are no 'right' or 'wrong' answers.
- You can turn your camera off, if you prefer.
- You can stop at any time, no explanation needed
- If you need a comfort break, please just say, that's absolutely fine
- If any question doesn't make sense, ask for an explanation.
- You will receive a £20 shopping voucher as a thank you for taking part. A voucher will be emailed to you within the next 5-7 days.

With your permission we are going to audio/video (if you keep your camera on) record the interview so that we can focus on what you are saying. The interviews will be transcribed by a member of our research team. We remove any reference to any places, clinicians/therapists/family members that may give away your (or others) identity during transcription.

1  
2  
3 The original transcription will be stored in a restricted-access folder restricted-access folder on the  
4 King's College London (KCL) cloud server, and no one other than immediate members of the  
5 research team can access this.  
6

7 Anonymised quotes from transcripts will be used in written reports, published journal articles and  
8 presentations including online. Again, any reference to places/family members/clinicians and so on  
9 will be removed.  
10

11 *Ask:* Do you have any questions about how we use your comments? Please feel free to ask anything  
12 however minor it may seem at this stage or at any time later.  
13

14 *Ask:* Is it okay to record the interview?  
15

- 16
- 17 • If participant not satisfied: answer any questions they have. If they do not want to participate,  
18 thank them for their time and finish the interview at this point.  
19

### 20 **Explain procedure**

21  
22  
23 I will begin the interview with my name, the date, time and the identifying code we have assigned to  
24 you and your child - this is just to keep the recordings organised. All your identifying details will be  
25 removed when the data is transcribed. The first part will be a little about yourself and your family,  
26 followed by general questions about the project such as how you were recruited and your  
27 expectations, then moving on to the STEPS programme more specifically and then ending with any  
28 recommendations and your overall experience of being involved in OPTIMA.  
29

30 *Ask:* Do you have any questions before we start?  
31

32 *Ask:* Is it okay for me to start recording now?  
33

34 *State researcher's name, date, time, and identifying code (for data management)*  
35

### 36 **Warm up**

37  
38  
39 Please tell me a bit about your family. Where do you live? How many children do you have?  
40

41  
42 Can you tell me why you went for an assessment for your child (name). Did you go via school? Did  
43 you self-refer? GP?  
44

45 Thinking about the last three months you have taken part in the trial, have you noticed any changes  
46 in your child's behaviour? Types of behaviour? Severity of behaviour? Frequency and so on.  
47

### 48 **I am now going to ask you some questions about being part of the OPTIMA trial and using the** 49 **STEPS app.** 50

- 51 1) Tell me a bit more about your technical experience of using the app  
52
  - 53 - How did you feel about the downloading/logging on process?
  - 54 - Was it technically easy to use/easy to understand?
  - 55 - How did you feel about the way the material was presented? Was it easy to navigate  
56 each STEP
  - 57 - Did you receive reminders to use the app? If so, how did you feel about these (eg length,  
58 regularity)  
59  
60

- 1  
2  
3  
4  
5  
6 2) Tell me a bit more about what you thought about the content of STEPS
- 7 - What did you think about what was included? (thinking about the videos/text)
  - 8 - How did you decide which buddy to choose? Did you change buddies at all while using
  - 9 the app? What did you think about the buddies? (If they did not like the buddies, probe
  - 10 asking what would have made them like them better/what type of buddy would they
  - 11 like to see).
  - 12
  - 13 - If you used the STEPS that included examples with children, what did you think about
  - 14 these examples? (Probe would they have like to see more of the children? If they did not
  - 15 like these examples, why?)
  - 16
  - 17 - Was there any content that you felt worked particularly well? Anything that could have
  - 18 done better?
  - 19
  - 20
- 21 3) Using the app
- 22 - At the time of using the app, what did your life look like? Would you say it was as
  - 23 normal, busier, quieter?
  - 24
  - 25 - Did you go through all the STEPS? If not, which/how many STEPS did you do?
  - 26
  - 27 - If you did not complete all STEPS was there a reason for this? What, if anything, would
  - 28 have made you complete all 8 STEPS?
  - 29
  - 30 - How did you find fitting the recommendations/strategies into everyday life?
  - 31
  - 32 - Were there any times of day in particular that you used the app?
  - 33
  - 34 - Were there any particular places that you used the app? Prompt: At home, car, on
  - 35 school run etc
  - 36
  - 37 - Did you use the STEP in the order it was set out or did you move around within each
  - 38 STEP (eg download resources before watching the film clip).
  - 39
  - 40 - Did you complete a STEP all in one go or did you dip in and out?
  - 41
  - 42 - Did you show the app or talk about it to anyone in your family such as partner or
  - 43 grandparents? Did anyone else interact with the app? If so, how often?
  - 44
- 45 4) Implementing the app
- 46 - Did STEPS influence the way you approached your child's behaviour? If yes, in what way.
  - 47 If no, why do you think this was?
  - 48
  - 49 - Did you use any of the strategies in the app? If so which ones? If you did not make any
  - 50 changes to parenting or your thinking, why?
  - 51
- 52 5) Expectations and reality of using the app
- 53 - Thinking about your **expectations** of STEPS prior to usage. How effective did you
  - 54 **expect** it to be? Prompt for expected effects
  - 55
  - 56 - Did you expect benefits in any other aspects of life?
  - 57
  - 58 - Thinking about the **reality** of using the STEPS once you had started using it. How
  - 59 effective did you find it to be? Prompt for impact on child's behaviour.
  - 60
  - 61 - Did you find benefits in any other aspects of life?
  - 62
  - 63 - Which aspects of the STEPS programme were particularly helpful/unhelpful?



1  
2  
3 **Follow up question depending on answer:** You have mentioned that the programme  
4 impacted on X (Follow-up from previous questions). How do you think STEPS influenced  
5 that? Was there anything that influenced the impact that STEPS had? If no impacts prompt  
6 why?  
7  
8

9 6) Would you change anything about the STEPS intervention?

- 10 - What additional information, if any, should be included?
- 11 - Was anything included that was unnecessary?

12  
13  
14 7) How did you feel about receiving STEPS as a digital intervention?

- 15 - Would you have preferred another format? If so what?

16  
17 8) Had you received any parent training prior to (or during) being offered STEPS? If no move on to  
18 next question. If yes, ask

- 19 - What type of parenting training did you receive? When did you receive it?
- 20 - Did the other PT change the way you viewed STEPS? Probe: Was it helpful? Different?

21  
22  
23  
24  
25  
26  
27 Thank you for answering these questions. We only have a few questions left now and these will  
28 focus on the future of STEPS:  
29

### 30 **Future Direction**

31  
32 8) If the STEPS programme is found to be effective, are there any changes you can think of that  
33 we should make before it is routinely offered to parents seeking help for their child's  
34 behavioural difficulties?  
35

36  
37 9) At what point in seeking support from a service do you think it would be most helpful for  
38 parents to be given access to STEPS?

- 39 - How should this access be given (e.g. through the school, GP, CAMHS)
- 40 - Would you recommend the STEPS programme to other parents whose children need support?
- 41 - Can you give me a few words that you would use to describe the STEPS app to someone else?

42  
43  
44  
45  
46 **For the final questions I wanted to ask about your experiences of the recruitment process into the**  
47 **OPTIMA trial. The OPTIMA trial is a study where we are testing whether providing support to**  
48 **parents on a service waitlist via a mobile phone app is an effective way of helping them to deal**  
49 **with some parenting challenges.**  
50

51 10) How did you feel about the way you were approached to take part? If you remember how  
52 long you had been on the waiting list when we contacted you, would you have preferred to  
53 be contacted earlier or later on?  
54  
55

56  
57 11) What made you decide to take part in the study? What were your initial thoughts about the  
58 OPTIMA study?  
59  
60

- 1  
2  
3 12) How did you feel when you were told you would be testing the STEPS app?  
4 - What did you hope to get out of testing the app from both you and your child's point of  
5 view?  
6  
7

- 8 13) Finally, what did you think of the online questionnaires such as how long they took, the ease of  
9 understanding the questions and getting a voucher as an incentive.  
10  
11

### 12 **End of questions**

14 That reaches the end of the interview and questions I wanted to ask you.

16 Thank you so much for giving me your time.

- 17  
18 • Do you have anything else you wish to speak about that hasn't been mentioned?  
19  
20 • Let interviewee talk if they have anything else to add  
21  
22 • If nothing else – then close interview  
23

24 If you are okay to end the interview there, I will stop recording now.  
25  
26

27 *Stop recording*  
28  
29

### 30 **Mood Repair**

31  
32  
33 Ask the participant if they have anything nice planned for the rest of the day. If they have any family  
34 plans for the weekend (or similar ensuring the participants mood is lifted before you close the  
35 interview).  
36

### 37 **Debriefing**

- 38  
39  
40 • Ask how they are feeling – whether anything in the interview has troubled them or  
41 distressed them or if anything requires clarification  
42  
43 • They can email me if they have any follow up questions  
44  
45 • Thank them again, and ask if they are feeling okay to end interview here.  
46  
47  
48 • Remind about the voucher.  
49  
50  
51  
52  
53  
54  
55  
56  
57  
58  
59  
60

## CLINICIAN INTERVIEW SCHEDULE

### Preamble

Check that the interviewee has received the information sheet, understands the OPTIMA project and his/her role in it

Explain that:

The aim of the OPTIMA trial was to investigate whether a parenting programme (STEPS) delivered online to parents seeking help from CAMHS for their child's behavioural difficulties was effective in reducing rates of oppositional defiant disorder.

The research team is speaking to parents and clinicians who were involved in the trial.

We are interested in individual experiences and thoughts about the OPTIMA trial so please give honest responses, as both positive and negative feedback will help us improve the intervention. Explain that they will be asked questions relating to their involvement in the OPTIMA, experiences with recruitment, and factors relating to their institution e.g. NHS. However, we combine all the data we collect to provide an overall picture of OPTIMA and its implementation and any comments in the report are attributed very generally, for example, "A clinician commented that..." All comments/opinions will be strictly confidential.

Ask: Do you have any initial questions about the project?

### Ethics

Remind interviewee:

- The interview will take about 20 minutes
- You do not have to answer any questions that you are not comfortable with and there are no 'right' or 'wrong' answers
- You can turn your camera off if you wish
- You can stop at any time, no explanation needed
- If you need a comfort break, please just say, that's absolutely fine
- If any question doesn't make sense, ask for an explanation

With your permission we are going to record the interview so that we can focus on what you are saying. This will be transcribed by a member of the research team.

We remove any reference to any places, therapists/family members that may give away yours (or others) identity during transcription.

The original transcription will be stored in a restricted-access folder on the King's College London (KCL) cloud server and no one other than immediate members of the research team can access this.

Ask: Do you have any questions about how we use your comments?

Ask: Is it okay to record the interview?

- If participant not satisfied: answer any questions they have. If they do not want to participate, thank them for their time and finish the interview at this point.

### Explain procedure

I will begin the interview with my name, the date, and time - this is just to keep the recordings organised. All your details will be anonymised when the data is transcribed. The first part will be a little about yourself, followed by general questions about the OPTIMA trial, moving on to your views on recruitment, and ending with institutional issues and future direction.

Ask: Do you have any questions before we start?

Ask: Is it okay for me to start recording now?

### Start Interview

*State researcher's name, date, and time (for data management)*

I want to start by asking some questions about you:

### **Background Questions**

Please briefly describe your professional background

**Prompt** (if not covered)

- What is your job title?
- How long have you worked as a clinician with children/young people?

What treatment recommendations would you normally make for young people with ...

**Prompt** (if not covered)

- Referral to a specialist therapist?
- Behavioural treatments and/or medication (referred for? Or given by themselves?)

Now I am going to ask you questions about being part of the OPTIMA trial (if Clinician has not heard about the OPTIMA trial, move on to the next question).

### **Questions about OPTIMA trial**

How did you find out about the STEPS intervention?

What were your expectations of the OPTIMA trial?

- Did it sound like something that would be effective?
- Did you expect people to take part?

Thank you for these answers, that's been really helpful. I'd now like to move on and ask about your thoughts on the STEPS intervention (give a brief summary of the STEPS intervention here).

### **Questions about the STEPS intervention**

What do you think about offering parents on the waiting list for assessment child behavioural difficulties the opportunity to take part in the OPTIMA trial and receive STEPS?

Why do you think parents may have agreed to take part?

Why do you think parents may have declined to take part?

Why do you think parents may not have persisted with the STEPS intervention?

How might STEPS impact on child behaviour?

What factors might influence the effectiveness of the STEPS intervention? Prompt parent factors.  
Prompt child factors

What might be the barriers to engaging with an online intervention such as STEPS (if not covered) .

How can we better engage parents and families in future work?

Have you received any feedback from parents about the STEPS intervention? If so, what was it?

How do you think online parenting programmes compare to face to face programmes?

Thank you for answering those questions. We only have a few questions left now and these will focus on institutional factors:

**Institutional factors**

How do you think the NHS could incorporate the STEPS programme into everyday practice?

**Prompt**

- Feasibility
- Benefits
- Obstacles

Do you think the NHS would be able to/willing to fund such a project?

**Prompt**

- Costs versus benefits
- Good use of money?

**Future Direction**

Overall, would you recommend the STEPS intervention to parents?

**Prompt**

- Why?
- At what point of referral/child age?

**End of questions**

That reaches the end of the interview and questions I wanted to ask you.

Thank you very much for your time.

- Do you have anything else you wish to speak about that hasn't been mentioned?
  - Let interviewee talk if they have anything else to add
  - If nothing else – then close interview

If you are okay to end the interview there, I will turn the recording off.

*Turn recording off*

**Debriefing**

- They can email me if they have any follow up questions/comments
- Thank them again, and ask if they are feeling okay to end interview here.

# BMJ Open

## A protocol for the process evaluation of a Structured E-parenting Support (STEPS) in the OPTIMA randomised controlled trial.

|                                 |                                                                                                                                                                                                                                                                                                                                                                                                                                                                                                                       |
|---------------------------------|-----------------------------------------------------------------------------------------------------------------------------------------------------------------------------------------------------------------------------------------------------------------------------------------------------------------------------------------------------------------------------------------------------------------------------------------------------------------------------------------------------------------------|
| Journal:                        | <i>BMJ Open</i>                                                                                                                                                                                                                                                                                                                                                                                                                                                                                                       |
| Manuscript ID                   | bmjopen-2023-081563.R2                                                                                                                                                                                                                                                                                                                                                                                                                                                                                                |
| Article Type:                   | Protocol                                                                                                                                                                                                                                                                                                                                                                                                                                                                                                              |
| Date Submitted by the Author:   | 04-Apr-2024                                                                                                                                                                                                                                                                                                                                                                                                                                                                                                           |
| Complete List of Authors:       | Hedstrom, Ellen; University of Southampton - Highfield Campus, Psychology<br>Kostyrka-Allchorne, Katarzyna; KCL; Queen Mary University of London<br>French, Blandine; University of Nottingham, Institute of Mental Health<br>Glazebrook, Cristine; University of Nottingham, Psychiatry<br>Hall, Charlotte; Institute of Mental Health, NIHR CLAHRC-East Midlands, Psychiatry<br>Kovshoff, Hanna; University of Southampton, School of Psychology<br>Lean, Nancy; KCL<br>Sonuga-Barke, Edmund; King's College London |
| <b>Primary Subject Heading</b>: | Qualitative research                                                                                                                                                                                                                                                                                                                                                                                                                                                                                                  |
| Secondary Subject Heading:      | Evidence based practice, Health economics                                                                                                                                                                                                                                                                                                                                                                                                                                                                             |
| Keywords:                       | Randomized Controlled Trial, Behavior, Clinical Trial, eHealth, Protocols & guidelines < HEALTH SERVICES ADMINISTRATION & MANAGEMENT                                                                                                                                                                                                                                                                                                                                                                                  |
|                                 |                                                                                                                                                                                                                                                                                                                                                                                                                                                                                                                       |

SCHOLARONE™  
Manuscripts

1  
2  
3 **A protocol for the process evaluation of a Structured E-parenting Support (STEPS) in**  
4 **the OPTIMA randomised controlled trial.**  
5  
6  
7  
8

9 Ellen Hedström<sup>1</sup>, Katarzyna Kostyrka-Allchorne<sup>2,3</sup>, Blandine French<sup>4,5</sup>, Cristine  
10 Glazebrook<sup>4,5</sup>, Charlotte L. Hall<sup>4,5</sup>, Hanna Kovshoff<sup>1</sup>, Nancy Lean<sup>3</sup> and Edmund J.S. Sonuga-  
11 Barke<sup>3,6</sup>.  
12  
13  
14

- 15  
16  
17 1. Centre for Innovation in Mental Health, School of Psychology, Faculty of Environmental  
18 and Life Sciences, University of Southampton, Southampton, UK
- 19 2. Department of Psychology, School of Biological and Behavioural Sciences, Queen  
20 Mary University of London, UK.
- 21 3. Department of Child and Adolescent Psychiatry, Institute of Psychiatry, Psychology &  
22 Neuroscience, King's College London, UK.
- 23 4. NIHR MindTech MedTech Co-operative, Academic Unit of Mental Health & Clinical  
24 Neurosciences, Faculty of Medicine & Health Sciences, University of Nottingham, UK.
- 25 5. Centre for ADHD and Neurodevelopmental Disorders Across the Lifespan CANDAL  
26 Institute of Mental Health, University of Nottingham, UK.
- 27 6. Department of Child & Adolescent Psychiatry, Aarhus University, Denmark.  
28  
29  
30  
31  
32

33 Correspondence: Professor Edmund J.S. Sonuga-Barke, School of Academic Psychiatry,  
34 Institute of Psychiatry, Psychology and Neuroscience, King's College London, London, UK;  
35 Email: [edmund.sonuga-barke@kcl.ac.uk](mailto:edmund.sonuga-barke@kcl.ac.uk)  
36  
37  
38  
39

40 **Funding:** This project is funded by the National Institute for Health Research (NIHR)  
41 Program Grants for Applied Research (RP-PG-0618-20003). The views expressed are those  
42 of the authors and not necessarily those of the NIHR or the Department of Health and Social  
43 Care. The funding body played no role in the study design and conduct.  
44  
45  
46  
47  
48  
49  
50  
51  
52  
53  
54  
55  
56  
57  
58  
59  
60

## Abstract

**Introduction:** *Structured E-parenting Support* (STEPS) is a digital application (app) designed to help parents manage behaviour of their children who are referred to mental health services and are waiting for an assessment or treatment. STEPS is currently being evaluated in The Online Parent Training for the Initial Management of ADHD (OPTIMA) randomized controlled trial. Alongside the examination of STEPS' clinical and cost-effectiveness, we are conducting a process evaluation to better understand the contextual factors that may influence study outcomes. The purpose of this protocol is to describe the aims, objectives, and methodology of the process evaluation prior to it taking place to add to the fidelity and rigour of the trial process and outcomes. Our goal is to adapt STEPS to optimise its benefits in future applications. **Methods:** In line with the Medical Research Council guidelines for evaluating complex interventions, the process evaluation will adopt a mixed method design using qualitative data collected from clinicians and parent interviews and app usage data from participants assigned to the intervention arm. **Analysis:** Qualitative data from semi-structured interviews and free text box responses included in trial questionnaires will be analysed thematically using framework analysis to better understand how parents use STEPS, how it works and key factors that could aid or hinder its effective implementation in routine clinical practice. **Ethics:** The application for ethical approval for the study was submitted to the North West - Liverpool Central Research Ethics Committee and received a favourable opinion on further information on 26 November 2021, reference number 21/NW/0319. **Dissemination:** The process evaluation aims to explore how a digital app might support parents in managing their child's behaviour. Implications for policy and research will be explored and the clinical implications of offering the app to a wider audience to address the lack of support to parents as highlighted in this paper. We plan to publish findings in international, peer-reviewed journals as well as present at conferences.

Trial registration: The trial has been prospectively registered on 18 November 2021; ISRCTN 8 16523503. <https://www.isrctn.com/ISRCTN16523503>.

Keywords: Process evaluation, ADHD, Conduct problems, Randomized Controlled Trial, Digital health, Parenting intervention



### Strengths and Limitations of this study

- Framework analysis allows for in-depth data analysis using a rigorous and transparent methodology.
- Outcomes for quantitative data such as app usage metrics will be integrated with qualitative findings.
- Inclusion of members from the OPTIMA patient and public involvement panel to advise on best practice in working with participants as well as assisting in data analysis and interpretation of the study results.
- All eligible participants were invited to partake in interviews, including those who did not complete all timepoints and those who did not download or use the app, to further understand barriers to uptake and usage of the STEPS app.
- A potential limitation of this study is the crossover of team members working on both the RCT and the process evaluation which may influence the interpretation of the qualitative data.

## INTRODUCTION

Attention-deficit/hyperactivity disorder (ADHD) is a common neuro-developmental condition characterised by symptoms of inattention and/or impulsivity-hyperactivity (1). Children referred for ADHD assessment may also present with co-morbidities such as symptoms of conduct problems (2), which can negatively impact the family (3). The National Institute for Health and Care Excellence (NICE) recommends families should receive support as soon as possible after their referral, however, despite these recommendations, parents frequently endure long waiting times for diagnostic assessment and treatment. The average time between seeking help and receiving an ADHD diagnosis has been estimated as 18.3 months in the UK: the longest average interval compared to other European countries (4). Lengthy waiting times and scarcity of services are the most common barriers to accessing mental health services for children and adolescents as reported by parents (5). Furthermore, these waiting times are likely to get even longer, given consistent rises in the number of referrals to Child and Adolescent Mental Health Services (CAMHS) (6).

A robust body of research has established the efficacy of parent training as a psychosocial intervention for children and young people (7). Research has found that parent training may reduce conduct problems in children with ADHD (8). Moreover, Daley et al. (9) conducted a meta-analysis on behavioural interventions that established improvements in parenting quality as well as a reduction in child ADHD symptoms and conduct problems. However, despite evidence of its efficacy, parent training may not be made available until a diagnosis has been established, leaving parents without support during the lengthy waiting period which can have a detrimental effect on children and their families (10).

Considering evidence that parent training can have a positive outcome for both parent and child, and to provide families with much-needed timely and accessible support, we have developed a digital parenting application called Structured E-Parenting Support (STEPS). Research suggests that digital health interventions (DHIs), such as mobile apps, may have great potential to deliver large-scale, cost-effective support (11). However, there is a real need to understand how health and digital research can work together for effective implementation (12).

### **The STEPS app and OPTIMA trial**

STEPS has been designed to support parents of children with ADHD-type symptoms that are accompanied by challenging behaviour and who are awaiting clinical diagnostic assessment. Its structure, content and approach are described in Appendix A. STEPS draws inspiration from some of the principles underpinning the New Forest Parenting Program (NFPP) (13), an

established face-to-face parent program based on a long track record of research and clinical practice relating to parenting of child behaviour problems. However, its content, structure, and approach, tailored to the digital delivery, are substantively different from the NFPP. STEPS is delivered via a mobile app that aims to improve parents' understanding of their child's challenging behaviour and increase their perceived self-efficacy to manage such behaviours, as well as facilitate effective parent-child communication. STEPS has one preparatory module, "Introduction", followed by eight separate intervention modules (steps) to be followed in order. Each of the eight steps is designed to take about 20 minutes if completed in one go. The content is delivered via short, pre-recorded videos, audio clips and text, and parents can download resources as well as make notes on their own reflections within each of the modules (steps) (Table 1).

**Table 1.**

*The STEPS app modules' titles and aims.*

| MODULE Title              | Module Aim                                                                                                              |
|---------------------------|-------------------------------------------------------------------------------------------------------------------------|
| 1. Make a fresh start     | To encourage parents to see their child and themselves in a new, more positive way.                                     |
| 2. Look after yourself    | To emphasize the importance for parents to find time for themselves and to make links with other parents.               |
| 3. Get their cooperation  | To explain ways parents can communicate more effectively with their children                                            |
| 4. Build their confidence | To highlight the importance for parents to create situations in which they can praise their child                       |
| 5. Lead by example        | To help parents think of ways they can avoid losing their temper with their children when they are being difficult.     |
| 6. Guide & support them   | To show how parents can help their children navigate difficult situations where they may find themselves getting upset. |
| 7. Give them structure    | To demonstrate how vital it is that everyone signs up to and follows the house rules                                    |
| 8. Reducing conflict      | To explain how using rewards and sanctions can promote better behaviour in children.                                    |

1  
2  
3 In our previous study, parents rated the app's usability level as very high; the overall STEPS  
4 usability score on the System Usability Scale was 94.8 (SD 4.8) out of 100 (14). Moreover,  
5 feedback received was used to optimise the app in preparation for the trial. For example, we  
6 improved and simplified the registration process, improved video playback and added  
7 captions to videos.  
8  
9

10  
11 The efficacy and cost-effectiveness of STEPS is currently being evaluated in the Online  
12 Parent Training for The Initial Management of ADHD referrals (OPTIMA) randomized  
13 controlled trial (15). Optima is a two-arm, superiority parallel randomised controlled trial  
14 with an internal pilot (14). Participant recruitment took place from May 2022 to July 2023  
15 and during this time 352 parents were randomly assigned to either the intervention group  
16 (access to the STEPS app for 3 months) or the Wait as Usual comparison group (WAU) on  
17 completion of baseline measures. Randomisation was carried out online via a secure platform  
18 provided by Sealed Envelope in a 1:1 ratio and stratification by trial centre location (London,  
19 Nottingham, Southampton) using random permuted blocks procedure with varying block  
20 sizes. The randomisation system used a unique identifying number.  
21  
22

23  
24 Questionnaires are administered via Sealed Envelope, every three months at five timepoints.  
25 Participants were recruited from mental health services across London, Nottingham,  
26 Portsmouth, Southampton and Gloucester, after initial eligibility has been established via a  
27 positive screen for high levels of hyperactivity ( $\geq 8$ ) and conduct problems ( $\geq 4$ ) as measured  
28 by the Strengths and Difficulties Questionnaire (16). As part of the screening process,  
29 researchers checked whether parents had a phone with an operating system that was  
30 compatible with the app and were sufficiently proficient in English to be able to use the app  
31 and understand it. Participation in the study does not impact clinical care the family receives,  
32 or the time spent on the waitlist. There are no restrictions on concomitant care, which has  
33 been monitored carefully during the trial through the child and adolescent service use  
34 questionnaire (17). During the study, trial administrators have been on hand to help parents  
35 with any technical issues if the app visual download and use guide, which they received from  
36 the study team, was insufficient.  
37  
38

39  
40 The primary outcome of the OPTIMA trial is the severity of behaviour problems at 3 months  
41 post-randomisation compared to WAU care using parent-reported child behaviour problems  
42 measured with the eight-item ODD subscale of the Swanson Nolan and Pelham Rating Scale  
43 (SNAP-IV) (18). For the process evaluation, the mean difference between timepoint one and  
44  
45  
46  
47  
48  
49  
50  
51  
52  
53  
54  
55  
56  
57  
58  
59  
60

1  
2  
3 two of the primary outcome will be measured for the intervention arm only. Data relating to  
4 the study outcomes comparing the two groups will be published in separate papers.

### 6 **Process Evaluation Aims and Objectives**

8 Establishing a methodology by which the process evaluation will adhere to a priori is useful  
9 to ensure rigour and improve trial quality. Using Medical Research Council (MRC)  
10 guidelines (19), this protocol describes the method for the process evaluation of STEPS  
11 within the OPTIMA trial. Furthermore, the Standard Protocol Items: recommendations for  
12 interventional trials (SPIRIT) checklist has been utilised to provide evidence-based guidance  
13 in producing this protocol and is a widely accepted standard for trial protocols (20). Specific  
14 objectives are to:  
15  
16  
17  
18  
19

- 20  
21 1. To assess the i) reach ii) dose iii) fidelity iv) impact and v) context of the intervention.  
22 Table 2 defines the components of process evaluation and shows the methods by  
23 which the required information is gathered.
- 24  
25 2. To describe how parents implement STEPS.
- 26  
27 3. To explore parents' and clinicians' views concerning the value of STEPS and to  
28 describe this in the context of their respective needs.
- 29  
30 4. To explore external factors that may have acted as barriers to, or facilitators of,  
31 STEPS uptake and engagement.
- 32  
33 5. To consider the sustainability of the STEPS app beyond the trial and, if shown to be  
34 effective, the possible ways it could be incorporated into the clinical pathways.
- 35  
36 6. Evaluation of mechanisms of impact (mediating factors contributing to the outcome)  
37 and context (intrapersonal and environmental factors influencing app usage).  
38  
39  
40  
41  
42  
43  
44  
45  
46  
47  
48  
49  
50  
51  
52  
53  
54  
55  
56  
57  
58  
59  
60

**Table 2.***The STEPS Process evaluation components and methodology.*

|          | Description                                                                                                 | Data collected                                                                                                                                                                                   | Method of evaluation                                                                                                                                                                                                                                                                                                                                                                                                                        |
|----------|-------------------------------------------------------------------------------------------------------------|--------------------------------------------------------------------------------------------------------------------------------------------------------------------------------------------------|---------------------------------------------------------------------------------------------------------------------------------------------------------------------------------------------------------------------------------------------------------------------------------------------------------------------------------------------------------------------------------------------------------------------------------------------|
| Reach    | The extent to which the intervention reached the intended participants as outlined above in criteria        | Data capture via a secure web platform (SE) including age, ethnic origin, education and income of parents and age, gender and ethnicity of child collected at baseline.                          | Basic statistics including means, ranges and standard deviations. Attrition rates to be calculated at each timepoint.                                                                                                                                                                                                                                                                                                                       |
| Dose     | Level of intervention delivered and received                                                                | STEPS app data downloaded via the application developers Bitjam.                                                                                                                                 | STEPS usage data including time spent per STEP before moving on to the next one, time spent within each STEP and number of STEPS completed. Mean times, ranges and standard deviations will be calculated.                                                                                                                                                                                                                                  |
| Fidelity | Was the intervention delivered as intended including exploring adaptations or changes made during the study | Data from captured via a secure web platform (SE) on trial expectations.<br><br>Recordings and minutes from regular PPI panel meetings.<br><br>Participant feedback on app communication/support | Trial expectations collected at baseline as multiple choice and free text boxes.<br><br>PPI panel feedback on suggestions for change/adaptations.<br><br>Participant responses to support material provided throughout the app usage (written instructions/video guides)                                                                                                                                                                    |
| Impact   | Did the intervention produce change? If so, how?                                                            | Parent and clinician interviews.<br><br>Quantitative data exploring changes in outcome measures (ODD) between timepoint 1 and 2.                                                                 | 30-45 minute parent interviews on the experiences of using the STEPS app including technology, engagement with the STEPS, effect on child behaviour and suggestions of adaptations to the app (see appendix B). Interviews with clinicians on any noticed effects on patients if applicable, barriers to use within the service and suggestions on effective implementation.<br><br>SNAP-IV ODD subscales measured at baseline and 3 months |
| Context  | External factors influencing change in parent and/or child behaviour and intervention uptake.               | Parent interviews exploring changes in child behaviour.                                                                                                                                          | Interviews as above.                                                                                                                                                                                                                                                                                                                                                                                                                        |

Note. ODD=Oppositional Defiance Disorder; PPI=Patient and Public involvement; SE=Sealed Envelope; SNAP IV O (oppositional problems) (20,21)

1  
2  
3 Following MRC guidelines for process evaluations (19), a logic model has been  
4 developed (Table 3) to elucidate the mechanisms by which the STEPS intervention will  
5 produce an outcome and inform the framework of the qualitative analysis. A logic model  
6 can be useful in representing the theory of the intervention and its outcomes and helps to  
7 clarify the main aspects of the intervention as well as aid in data collection and analysis  
8 (21). The STEPS logic model clarifies the current issues in parent support for those  
9 waiting on a diagnosis for their child as well as expands on the implications for STEPS  
10 use beyond the study. Moreover, by providing a step-by-step process from developing the  
11 research question to understanding how outcomes were achieved, it ensures that  
12 researchers adhere to the pre-determined process of delivery and analysis.  
13  
14  
15  
16  
17  
18  
19  
20  
21  
22  
23  
24  
25  
26  
27  
28  
29  
30  
31  
32  
33  
34  
35  
36  
37  
38  
39  
40  
41  
42  
43  
44  
45  
46  
47  
48  
49  
50  
51  
52  
53  
54  
55  
56  
57  
58  
59  
60

**Table 3.***STEPS Logic Model*

| <b>Problem</b>                                                                                                                                                                                                                                                                                               | <b>Proposed Solution</b>                                                                                                                                                            | <b>Input and intervention</b>                                                                                                                                                                                                                                                                                                                                                                                                                                                                                                                                                                                                                            | <b>Mechanisms of impact</b>                                                                                                                                                                                                                                                                                                                         | <b>Intended outcomes</b>                                                                                                                                                                                                                                                                                                                                                                                                         | <b>Intended impact</b>                                                                                                                                                                                                                                                                                                                                                                                                                                                                                                                                                    |
|--------------------------------------------------------------------------------------------------------------------------------------------------------------------------------------------------------------------------------------------------------------------------------------------------------------|-------------------------------------------------------------------------------------------------------------------------------------------------------------------------------------|----------------------------------------------------------------------------------------------------------------------------------------------------------------------------------------------------------------------------------------------------------------------------------------------------------------------------------------------------------------------------------------------------------------------------------------------------------------------------------------------------------------------------------------------------------------------------------------------------------------------------------------------------------|-----------------------------------------------------------------------------------------------------------------------------------------------------------------------------------------------------------------------------------------------------------------------------------------------------------------------------------------------------|----------------------------------------------------------------------------------------------------------------------------------------------------------------------------------------------------------------------------------------------------------------------------------------------------------------------------------------------------------------------------------------------------------------------------------|---------------------------------------------------------------------------------------------------------------------------------------------------------------------------------------------------------------------------------------------------------------------------------------------------------------------------------------------------------------------------------------------------------------------------------------------------------------------------------------------------------------------------------------------------------------------------|
| <p>ADHD is accompanied by Oppositional Defiant Disorder in up to 90% of referred cases.</p> <p>This is associated with child and parent distress and impairment which often drives referrals.</p> <p>Lengthy waiting times to receive assessment and diagnosis which can add to parent and child stress.</p> | <p>To provide low-intensity, unguided support for parents to help them better manage their children's challenging behaviour while they are awaiting formal clinical assessment.</p> | <p>Parents are screened via a secure hosting platform (MHE) or through local health services utilising the SDQ (<math>\geq 4</math> conduct problems and <math>\geq 8</math> attention and hyperactive problems).</p> <p>Access to STEPS is given post randomization to the intervention group (n=172) via research administrators and supported via text/email to download and utilise the app. The self-guided, parent training intervention, STEPS, is delivered via a mobile phone application.</p> <p>Parents work through 8 modules (steps) with content delivered via short videos and audio clips. Parents can download additional resources</p> | <p>STEPS draws on the evidence-based NFPP. It includes education about ADHD and uses behavioural techniques, including an emphasis on praise. The delivery of the intervention is underpinned by social learning theory.</p> <p>Modelling techniques are used to develop parenting skills (mastery) and to increase confidence (self-efficacy).</p> | <p>Increased parental understanding of ADHD and its impact on child behaviour.</p> <p>Increased knowledge of strategies to manage challenging child behaviour.</p> <p>Development of a positive parenting style.</p> <p>Improved parent-child communication</p> <p>Improved parental well-being and confidence in managing their child's oppositional behaviour. Reduced levels of oppositionality and defiance in children.</p> | <p>Improved support for parents while waiting on an assessment and diagnosis for their child.</p> <p>Cost-effective and time-efficient delivery of parent training, potentially reducing load on stretched child mental health services.</p> <p>Implementation of STEPS into the care pathway for children with symptoms of ADHD.</p> <p>Extension of parent training to more difficult-to-reach families and those too busy to attend training sessions.</p> <p>Impact on a broader range of family members and key adults (e.g., fathers/grandparents/childminders)</p> |



1  
2  
3  
4  
5  
6  
7  
8  
9  
10  
11  
12  
13  
14  
15  
16  
17  
18  
19  
20  
21  
22  
23  
24  
25  
26  
27  
28  
29  
30  
31  
32  
33  
34  
35  
36  
37  
38  
39  
40  
41  
42  
43  
44  
45  
46

| Problem                                                                                                       | Proposed Solution | Input and intervention                                                                                                                                                                                                                                                                                                                                | Mechanisms of impact                                                                                                                                | Intended outcomes                                                                                                                   | Intended impact |
|---------------------------------------------------------------------------------------------------------------|-------------------|-------------------------------------------------------------------------------------------------------------------------------------------------------------------------------------------------------------------------------------------------------------------------------------------------------------------------------------------------------|-----------------------------------------------------------------------------------------------------------------------------------------------------|-------------------------------------------------------------------------------------------------------------------------------------|-----------------|
| Lack of parenting support during waiting times can further add to parent stress and unwanted child behaviour. |                   | <p>and are prompted to reflect on progress via written or audio notes.</p> <p>Engagement is encouraged through use of pre-recorded digital buddies.</p> <p>Parents receive text reminders to engage with the app, tips on app usage and encouragement on completion of a STEP. These are sent via automated text and emails from research admins.</p> | A range of pre-recorded scripts using digital buddies to describe scenarios allows parents to choose a family dynamic that feels relatable to them. | By using digital buddies parents feel less alone and more supported in their journey by being able to relate to their chosen buddy. |                 |

ADHD=Attention Deficit Hyperactive Disorder; MHE=myHealth; NFPP=New Forest Parenting Program; SDQ=Strength and Difficulties Questionnaire; STEPS= Structured E-parenting support

## METHOD

### Design

This mixed-method process evaluation integrates qualitative and quantitative data. Qualitative data will be gathered from semi-structured interviews with parents and clinicians to explore the implementation of the intervention and the perceived impact of the intervention on parenting and child behaviour as well as expectations about the trial as reported by participants via free text responses on the trial questionnaires. Parallel to this, we will use quantitative data such as demographic data and app usage metrics. Table 2 describes the methods and evaluation of data collection.

### Qualitative data collection

Qualitative data collection will include semi-structured interviews with parents and clinicians and text gathered from Sealed Envelope asking parents about their trial expectations.

### Parent Interviews

Participants who meet the following criteria will be invited to interview; i) have consented to be contacted for interviews via the study consent form (optional consent statement), ii) have been randomised to the STEPS arm. Participants will be invited to take part in interviews irrespective of whether they engaged with the STEPS app or not. Views of participants who have not completed any of the steps are very important in the context of understanding barriers to usage. We aim to recruit n=50 parents for interviews.

Participants who have consented to be contacted about interviews will be approached by a researcher other than the one who has enrolled them on the trial to avoid unblinding.

Selection and allocation of eligible participants is completed by the trial manager and trial administrators. Researchers invite participants via email explaining the interview process.

The default method for conducting interviews will be a video/phone call (30-45 minutes duration). Participants who wish to complete the interview via email will be sent an adapted interview schedule. Offering a range of ways to engage in the interviews will ensure that those who feel unable to speak with a researcher on the phone will also be able to take part to give a breadth of views from parents.

The interview schedule has been developed by a team of experienced qualitative researchers in collaboration with the OPTIMA Patient and Public Involvement group (PPI). Once the team had finalised the interview schedule, the three researchers involved in conducting the

1  
2  
3 interviews, piloted the interviews with members from the PPI group and colleagues. Initially  
4 up to an hour had been allocated for the interviews but the pilot showed that 30-45 minutes  
5 was adequate time to cover all the questions. Furthermore, the PPI group felt that a decrease  
6 in the time required from the parents was more commensurate with the compensation for  
7 participation, a £20 Amazon gift voucher. The interview schedules remained dynamic and in  
8 the early stage of interviewing, the qualitative team worked together to adapt and add  
9 questions.  
10  
11  
12  
13  
14  
15  
16

17 Questions explore the technical experience of downloading and using the app, views on  
18 content and features of the app, such as the STEPS buddies, and feedback on if/how the app  
19 influenced aspects of parenting and child behaviour management. They will also ask  
20 participants about their thoughts on the effectiveness of STEPS in reducing their child's  
21 behavioural challenges and, if applicable, the perceived mechanisms by which STEPS is  
22 effective (see appendix B for full interview schedule). Interviews with parents took place  
23 between October 2022 and November 2023. All parents who were recruited into the  
24 intervention arm were invited to take part in interviews whether they had downloaded the app  
25 or not. Invitations went out three months after randomization, ensuring parents had the full  
26 three-month usage period of the app. All de-identified transcripts and email responses will be  
27 stored in electronic form on a KCL OneDrive for Business and SharePoint location. The  
28 original recordings or emails will be deleted from OneDrive for Business after transcription.  
29  
30  
31  
32  
33  
34  
35  
36  
37  
38

### 39 **Clinician Interviews**

40 Clinicians form no active part in the OPTIMA RCT with the study being independent of any  
41 clinical input from CAMHS or other healthcare providers. However, to be eligible for  
42 participation in the OPTIMA trial, parents must be on a current wait list for their child to  
43 receive clinical support and clinics have been informed of the nature of the OPTIMA RCT. It  
44 is therefore important to gain clinical perspectives to effectively evaluate the STEPS app in  
45 terms of future directions and implementation. Managers in the clinical services that have  
46 supported OPTIMA RCT recruitment will be approached with a request to circulate the  
47 clinician information sheet to members of the team. Clinicians interested in taking part are  
48 asked to contact the team directly. The clinicians who are interviewed have no active  
49 involvement in the trial, the STEPS intervention or the collection of outcome data. Some  
50 participants may disclose their use of the STEPS app but the clinician is not asked to probe  
51 for this. The purpose of the interviews with clinicians is to get their views about the impact of  
52  
53  
54  
55  
56  
57  
58  
59  
60

1  
2  
3 STEPS, potential factors influencing parent engagement and perceived barriers to  
4 effectiveness with the aim of facilitating implementation into clinical services.  
5  
6  
7

8 Clinician interviews can help add depth to the qualitative data in terms of understanding the  
9 clinical context in relation to any outcomes shared by parents in terms of contact with  
10 services or receiving an assessment and/or diagnosis. Our aim is to include n=10 interviews  
11 from clinicians to give adequate representation across the three sites although if more  
12 clinicians come forward to be interviewed, they will be able to partake. Clinicians will all be  
13 interviewed via phone/video call and data stored as per the participants' data above. There is  
14 no incentive for clinicians to take part.  
15  
16  
17  
18  
19

### 20 **Quantitative data collection**

21  
22 To establish intervention adherence, the number of completed STEPS modules will be  
23 measured (min = 0; max = 8), with completion of two modules constituting adherence to the  
24 intervention. Other collected app usage events will include: the number of started modules,  
25 the number of videos watched, the time spent watching videos (in seconds), the number of  
26 audio clips listened to and the time spent listening to audio clips (in seconds), the number of  
27 reflections recorded, the number of items saved to favourites, and the number of accessed text  
28 resources. These will be used to provide descriptive information about app usage patterns.  
29  
30 To determine the intervention's reach, the process evaluation will use data collected from  
31 parents at baseline (pre-randomisation) via Sealed Envelope, including demographic data  
32 about the parent, such as parent's gender, parent ethnicity, parental education, parent  
33 employment status, parent relationship status and family socioeconomic status based on total  
34 household income as well as child's age, sex and ethnicity. To describe the severity of  
35 oppositional and defiant disorder symptoms and hyperactivity/impulsivity and inattention  
36 symptoms in the sample, the respective subscales from the parent-completed SNAP  
37 questionnaire will be used (22,23). The 8 items of the SNAP-IV ODD subscale have  
38 excellent internal consistency ( $\alpha=0.93$ ) and the subscale has been shown to be sensitive to  
39 change in clinical trials (24). Furthermore, given that ADHD and ASD often co-occur,  
40 parent-rated scores for the Social Communication Questionnaire-Lifetime (SCQ-L) will be  
41 included (25). The SCQ-L, used in this study to characterise the sample of participants  
42 receiving the intervention, has been found to have good internal consistency (Cronbach  
43  $\alpha=0.82$ ). A cut-off  $\Rightarrow 15$  differentiated young people with a clinical diagnosis of ASD from  
44 those without ASD (sensitivity = 0.70 and specificity = 0.67) (26). At baseline, parents are  
45  
46  
47  
48  
49  
50  
51  
52  
53  
54  
55  
56  
57  
58  
59  
60

1  
2  
3 asked about their trial expectations. Parents are also asked about previous engagement in  
4 parent training (yes/no answer), expectations of receiving parent training (strongly disagree to  
5 strongly agree), and expectations of the STEPS app (strongly disagree to strongly agree).  
6  
7  
8  
9

## 10 **DATA ANALYSIS**

### 11 **Qualitative data analysis**

12  
13  
14  
15 Our objectives are to explore the reach, dose, fidelity, impact and context of the intervention.  
16 Qualitative analysis will use a framework approach (27), utilising NVivo version 14,  
17 complemented by quantitative analysis. Framework analysis sits within the broader  
18 qualitative methodology of thematic analysis and allows researchers to compare data across  
19 cases as well as within cases, ensuring the individual's view is retained (27). Framework  
20 analysis is a flexible but rigorous method used in health research to integrate qualitative data  
21 from different informants and sources. It uses inductive or deductive approaches to identify,  
22 describe and interpret patterns (28). Three researchers will take part in both interviewing,  
23 transcribing and analysing transcripts with two senior members of the research team taking  
24 part in verifying a selection of transcripts. PPI members will work with the research team  
25 during the interpretation and verification stages of analysis. Specifically, PPI members will  
26 individually review a selection of transcripts to verify the researchers' interpretation of the  
27 data and also take part in group meetings to discuss codes and meanings. Although several  
28 members of the PPI team have prior experience in qualitative research, 2-3 hours of training  
29 on the introduction to qualitative research and how to read and code transcripts will be  
30 provided by the research team. Finally, the analysis will be overseen by experts in framework  
31 analysis and regular meetings between the researchers analysing the transcripts and the larger  
32 qualitative team, will ensure fidelity and cohesiveness in the coding process. The team will  
33 start by identifying a coding framework that aligns with the objectives of the study. Creating  
34 a data set, researchers will map out the codes and start looking for themes and relationships in  
35 the data set. As data moves from codes to themes, the original research questions as well as  
36 existing literature will be referred to and discussed and reviewed within the multidisciplinary  
37 team to ensure transparency and avoid bias. The method is appropriate for incorporating data  
38 from semi-structured interviews, PPI panel discussions and free text box data from  
39 questionnaires.  
40  
41  
42  
43  
44  
45  
46  
47  
48  
49  
50  
51  
52  
53  
54  
55  
56  
57  
58

### 59 **Quantitative data analysis**

1  
2  
3 Descriptive data on the study sample will be presented to include means, SD, medians,  
4 ranges, n values and percentages. Quantitative data measuring changes in oppositional  
5 behaviour (SNAP-IV ODD) between baseline and 3 months and making within-group  
6 comparisons will also help to assess the impact of the app.  
7  
8  
9

### 10 **Data integration**

11 The qualitative data extracted from interviews with parents and clinicians as well as text box  
12 data exploring parents' expectations about the study will provide the main source of data to  
13 explore the aims and objectives of the process evaluation. Alongside this, descriptive data  
14 from the online questionnaires will be used, both to provide context to the qualitative data in  
15 terms of demographics, but also to help refine the themes emerging from the qualitative data  
16 analysis. Mixed methods afford multiple perspectives and seek to converge the findings (29).  
17 Researchers will analyse the data synchronously and integrate the outcomes from the  
18 different datasets to provide a holistic overview of the results.  
19  
20  
21  
22  
23  
24

### 25 **Patient and Public Involvement (PPI)**

26 The OPTIMA RCT and STEPS app were developed in conjunction with an advisory board  
27 made up of parents of children with neurodevelopmental disorders including ADHD. The PPI  
28 group was established early on in the overall OPTIMA programme of research prior to the  
29 RCT taking place. The group advised the team about how the design and functionality of the  
30 app could be optimised as part of the panel group discussions as well as individually in the  
31 usability study (14). This was implemented and piloted before the RCT. The PPI group also  
32 supported the team in ensuring that the trial procedures were acceptable to the participants  
33 and that any participant-facing documents were written in clear and accessible language.  
34 Finally, they also helped with the development of the schedules for the parent interviews.  
35 In addition to regular PPI panel meetings throughout the study period, panel members  
36 advised on subjects such as how to communicate with parents most effectively, how to  
37 structure compensation for participating parents' time in the study and other study  
38 management-related questions. Further, members will be involved in the data analysis  
39 process, reading transcripts and taking part in meetings to discuss codes and meanings with  
40 OPTIMA researchers.  
41  
42  
43  
44  
45  
46  
47  
48  
49  
50  
51  
52

### 53 **Ethics and Dissemination**

54 All participants in the study consented to take part via e-consent on Sealed Envelope after  
55 having received written and oral information about the study including a brief participant  
56 information sheet (PIS) with condensed information in an easy-to-understand format and as  
57 well as a full PIS for their reference. All parents received a counter-signed, by the researcher,  
58  
59  
60

1  
2  
3 copy of their consent form. The study received ethical approval from the North West -  
4 Liverpool Central Research Ethics Committee on 26 November 2021, reference number  
5 21/NW/0319. Findings will be published in open-access, peer-reviewed scientific journals as  
6 well as be presented at conferences.  
7  
8  
9

## 10 11 **DISCUSSION**

12  
13  
14  
15 STEPS is a digital, self-guided app that is currently being evaluated in the OPTIMA RCT  
16 (15). To better understand the study outcomes and contextual factors influencing these, we  
17 are conducting a process evaluation using qualitative and quantitative data gathered from  
18 parents, clinicians, app usage and demographic data. We expect the results to allow us to  
19 understand how the app has worked, such as if it worked as intended, with the aim of  
20 understanding the implications of the potential wider use of STEPS, especially within a  
21 clinical setting. In understanding the strengths and weaknesses of the intervention, how the  
22 intervention was delivered and whether the intended audience received the intervention and  
23 how the app can be further developed and improved to attain its intended purpose, we aim to  
24 provide a cost-effective and self-guided support to parents awaiting clinical assessment  
25 and/or diagnosis for their child.  
26  
27  
28  
29  
30  
31  
32  
33

34 Research suggests that DHIs may have great potential to deliver large-scale, cost-effective  
35 support (11). The STEPS app may be able to bridge the gap between lengthy waiting times  
36 for a diagnosis of ADHD and the strains of managing difficult child behaviour. Furthermore,  
37 the study will contribute to a body of research that aims to understand how digital  
38 interventions work and the factors that contribute to their efficacy, with the aim of improving  
39 and understanding the practical implication of using STEPS as a viable DHI to be accessed  
40 by a wider population.  
41  
42  
43  
44  
45

### 46 **Strength and limitations**

47  
48 Integrating qualitative and quantitative data provides a comprehensive evaluation of the way  
49 in which the intervention has worked. Capturing the lived experience of parents through  
50 interviews will give valuable insight into both the mechanisms of how the app works as well  
51 as the impact on parenting and child behaviour. The data from the app provide detailed  
52 measures of how the app was used by participants and will help to better understand how the  
53 app was utilised (e.g., the number of times app was used or the length of time per each app  
54 use). Some caution must be exercised when analysing these data in terms of potential errors  
55 such as parents opening the app but not actually using it.  
56  
57  
58  
59  
60

1  
2  
3 Limitations in terms of breadth of participant involvement may occur, for example,  
4 participants who do not engage with the study may be less likely to respond to invites to take  
5 part in interviews. Participants' interview invites clearly state that the researchers are  
6 interested in all views, including those who did not engage with the STEPS app to ensure as  
7 wide reach as possible is attained.  
8  
9

10  
11 Interviews with clinicians may provide limited data as many parents in the study will not yet  
12 have been assessed, even after completing the final 12-month timepoint, meaning clinicians  
13 may have limited feedback/views from the parents regarding the app.  
14  
15  
16  
17

### 18 **Acknowledgements**

19 Thank you to Cathy Laver-Bradbury for providing advice on the STEPS concept  
20 and content. Special thanks go to Catherine Thompson for her work on an earlier prototype—  
21 New Forest On-Line. The authors would like to acknowledge and thank the expert members  
22 of the PPI panel. The views expressed are those of the authors and not necessarily those of  
23 the NHS, the NIHR or the Department of Health and Social Care.  
24  
25  
26  
27  
28  
29

### 30 **Authors' contributions**

31 ESB led the overall conception and design of the study and is the overall OPTIMA Chief  
32 Investigator. EH, KKA and ESB led the drafting of this manuscript. KKA is responsible for  
33 coordinating the study. BF and EH are responsible for enrolling participants and  
34 administering outcome measures and coordinating recruitment. EH and NL are responsible  
35 for participant interviews, transcription and qualitative data analysis. NL provides  
36 administrative support for the project and for the patient and public involvement activities.  
37 CH, HK and CG contributed to the conception and design of the study. HK and CG had  
38 overall responsibility for qualitative data analysis. All authors have read and approved the  
39 final version of this manuscript.  
40  
41  
42  
43  
44  
45  
46  
47  
48  
49

### 50 **Funding**

51 This project is funded by the National Institute for Health Research (NIHR)  
52 Programme Grants for Applied Research (RP-PG-0618-20003). The views  
53 expressed are those of the authors and not necessarily those of the NIHR or  
54 the Department of Health and Social Care. The funding body played no role in  
55  
56  
57  
58  
59  
60



1  
2  
3 the study design and conduct. This work was also supported in part by the NIHR Maudsley  
4 Biomedical Research Centre at South London and Maudsley National Health Service  
5 Foundation Trust and King's College London to ESB.  
6  
7  
8

### 9 **Competing interests**

10 STEPS concepts and content were designed by Edmund Sonuga-Barke together with other  
11 members of the OPTIMA team; David Daley, Johnny Downs, Jana Kreppner, Hanna  
12 Kovshoff and Margaret Thompson. STEPS visual design and digital implementation were  
13 completed by TOAD with funding provided to ESB by the South London & Maudsley NHS  
14 Trust. Videos were produced by EyeWitness Productions Ltd. funded by Solent NHS Trust.  
15 ESB has received speaker fees, consultancy or research funding from Takeda, Neurotech  
16 Solutions, QBtech and Medice. He has received royalties from the New Forest Parenting  
17 Programme.  
18  
19  
20  
21  
22  
23  
24  
25  
26  
27  
28  
29  
30  
31  
32  
33  
34  
35  
36  
37  
38  
39  
40  
41  
42  
43  
44  
45  
46  
47  
48  
49  
50  
51  
52  
53  
54  
55  
56  
57  
58  
59  
60

## REFERENCES

1. Dalrymple RA, Maxwell LM, Russell S, Duthie J. NICE guideline review: Attention deficit hyperactivity disorder: diagnosis and management (NG87). *Archives of disease in childhood-education and practice*. 2020 Oct 1;105(5):289-93.
2. Jensen PS, Martin D, Cantwell DP. Comorbidity in ADHD: Implications for research, practice, and DSM-V. *Journal of the American Academy of Child & Adolescent Psychiatry*. 1997 Aug 1;36(8):1065-79.
3. Theule J, Wiener J, Tannock R, Jenkins JM. Parenting stress in families of children with ADHD: A meta-analysis. *Journal of emotional and behavioral disorders*. 2013 Mar;21(1):3-17.
4. Fridman M, Banaschewski T, Sikirica V, Quintero J, Chen KS. Access to diagnosis, treatment, and supportive services among pharmacotherapy-treated children/adolescents with ADHD in Europe: data from the Caregiver Perspective on Pediatric ADHD survey. *Neuropsychiatric disease and treatment*. 2017 Mar 30:947-58.
5. Reardon T, Harvey K, Baranowska M, O'brien D, Smith L, Creswell C. What do parents perceive are the barriers and facilitators to accessing psychological treatment for mental health problems in children and adolescents? A systematic review of qualitative and quantitative studies. *European child & adolescent psychiatry*. 2017 Jun;26:623-47.
6. Ball WP, Black C, Gordon S, Ostrovska B, Paranjothy S, Rasalam A, Ritchie D, Rowlands H, Rzewuska M, Thompson E, Wilde K. Inequalities in children's mental health care: analysis of routinely collected data on prescribing and referrals to secondary care. *BMC psychiatry*. 2023 Dec;23(1):1-8.
7. Garbacz LL, Brown DM, Spee GA, Polo AJ, Budd KS. Establishing treatment fidelity in evidence-based parent training programs for externalizing disorders in children and adolescents. *Clinical Child and Family Psychology Review*. 2014 Sep;17:230-47.
8. Hartman RR, Stage SA, Webster-Stratton C. A growth curve analysis of parent training outcomes: Examining the influence of child risk factors (inattention,

- impulsivity, and hyperactivity problems), parental and family risk factors. *Journal of child psychology and psychiatry*. 2003 Mar;44(3):388-98.
9. Daley D, Van der Oord S, Ferrin M, Danckaerts M, Doepfner M, Cortese S, Sonuga-Barke EJ, European ADHD Guidelines Group. Behavioral interventions in attention-deficit/hyperactivity disorder: a meta-analysis of randomized controlled trials across multiple outcome domains. *Journal of the American Academy of Child & Adolescent Psychiatry*. 2014 Aug 1;53(8):835-47.
10. Gullhav AN, Skomsvoll JF, Heimstad R, Schultz JS. Reducing waiting times from 65 to under 40 days for children and adolescents receiving mental health services using a new scheduling policy. *Health Services Management Research*. 2022 Aug 31:09514848221122895.
11. Murray E, Hekler EB, Andersson G, Collins LM, Doherty A, Hollis C, Rivera DE, West R, Wyatt JC. Evaluating digital health interventions: key questions and approaches. *American journal of preventive medicine*. 2016 Nov 1;51(5):843-51.
12. Duffy A, Christie GJ, Moreno S. The challenges toward real-world implementation of digital health design approaches: narrative review. *JMIR Human Factors*. 2022 Sep 9;9(3):e35693.
13. Sonuga-Barke EJ, Thompson M, Abikoff H, Klein R, Brotman LM. Nonpharmacological interventions for preschoolers with ADHD: The case for specialized parent training. *Infants & Young Children*. 2006 Apr 1;19(2):142-53.
14. Kostyrka-Allchorne K, Chu P, Ballard C, Lean N, French B, Hedstrom E, Byford S, Cortese S, Daley D, Downs J, Glazebrook C, Goldsmith K, Hall C, Kovshoff H, Kreppner J, Sayal K, Shearer J, Simonoff E, Thompson M, Sonuga-Barke E Remote Recruitment Strategy and Structured E-Parenting Support (STEPS) App: Feasibility and Usability Study *JMIR Pediatr Parent* 2023;6:e47035 URL: <https://pediatrics.jmir.org/2023/1/e47035>. DOI: 10.2196/47035
15. Kostyrka-Allchorne K, Ballard C, Byford S, Cortese S, Daley D, Downs J, French B, Glazebrook C, Goldsmith K, Hall CL, Hedstrom E. Online Parent Training for The Initial Management of ADHD referrals (OPTIMA): the protocol for a randomised controlled trial of a digital parenting intervention implemented to support parents and children on a treatment waitlist. *Trials*. 2022 Dec 12;23(1):1003.
16. Goodman R. The Strengths and Difficulties Questionnaire: a research note. *Journal of child psychology and psychiatry*. 1997 Jul;38(5):581-6.

17. Barrett, B., Byford, S., Sharac, J., Hudry, K., Leadbitter, K., Temple, K., . . . consortium, P. (2012). Service and wider societal costs of very young children with autism in the UK. *Journal of autism and developmental disorders*, 42(5), 797-804.
18. Swanson JM, Kraemer HC, Hinshaw SP, Arnold LE, Conners CK, Abikoff HB, Clevenger W, Davies M, Elliott GR, Greenhill LL, Hechtman L. Clinical relevance of the primary findings of the MTA: success rates based on severity of ADHD and ODD symptoms at the end of treatment. *Journal of the American Academy of Child & Adolescent Psychiatry*. 2001 Feb 1;40(2):168-79.
19. Moore GF, Audrey S, Barker M, Bond L, Bonell C, Hardeman W, Moore L, O’Cathain A, Tinati T, Wight D, Baird J. Process evaluation of complex interventions: Medical Research Council guidance. *bmj*. 2015 Mar 19;350.
20. Chan AW, Tetzlaff JM, Altman DG, Laupacis A, Gøtzsche PC, Krleža-Jerić K, Hróbjartsson A, Mann H, Dickersin K, Berlin JA, Doré CJ. SPIRIT 2013 statement: defining standard protocol items for clinical trials. *Annals of internal medicine*. 2013 Feb 5;158(3):200-7.
21. Morgan trimmer et al. Creating a logic model for an intervention: evaluation in health and wellbeing (internet). (2018, August 07). Available from <https://www.gov.uk/guidance/evaluation-in-health-and-wellbeing-creating-a-logic-model>
22. Swanson JM. The SNAP Rating Scale for the Diagnosis of the Attention Deficit Disorder.
23. Swanson JM. School-based assessments and interventions for ADD students. KC publishing; 1992.
24. Johnson, M., Gillberg, C., Vinsa, I., Fransson, G., Samuelsson, L., Jakobsson, K., Östlund, S., Fernell, E. and Gillberg, C., 2023. A randomized controlled trial of a new intervention in early symptomatic syndromes eliciting neurodevelopmental clinical examinations: PR-ESSENCE. *European Child & Adolescent Psychiatry*, 32(1), pp.63-74.
25. Rutter M. Social communication questionnaire. (No Title). 2003.
26. Ung, D., Johnco, C., McBride, N.M., Howie, F., Scalli, L. and Storch, E.A., 2016. Optimizing the screening of autism spectrum disorders in outpatient clinics: An examination of the Social Communication Questionnaire-Lifetime. *Research in Autism Spectrum Disorders*, 27, pp.21-28.

- 1  
2  
3  
4  
5  
6  
7  
8  
9  
10  
11  
12  
13  
14  
15  
16  
17  
18  
19  
20  
21  
22  
23  
24  
25  
26  
27  
28  
29  
30  
31  
32  
33  
34  
35  
36  
37  
38  
39  
40  
41  
42  
43  
44  
45  
46  
47  
48  
49  
50  
51  
52  
53  
54  
55  
56  
57  
58  
59  
60
27. Gale NK, Heath G, Cameron E, Rashid S, Redwood S. Using the framework method for the analysis of qualitative data in multi-disciplinary health research. *BMC medical research methodology*. 2013 Dec;13(1):1-8.
28. Goldsmith, L. J. (2021). Using framework analysis in applied qualitative research. *The Qualitative Report*, 26(6), 2061-2076.  
doi:<https://doi.org/10.46743/2160-3715/2021.5011>
29. Almeida F. Strategies to perform a mixed methods study. *European Journal of Education Studies*. 2018 Aug 30.

For peer review only

## Structured E-Parenting Support (STEPS)



### What is STEPS?

STEPS is a parenting support intervention delivered in the form of a digital application (app).

### What is STEPS aiming to do?

STEPS has been designed to decrease conflict in the family by reducing levels of children's oppositionality and defiance. It helps parents to be more effective and self-confident in managing these problems. It is designed to be particularly helpful for the parents of children who are temperamentally more difficult to manage, such as those with attentional and impulse control problems. It is aimed at supporting parents of primary school-aged children.

### How was STEPS developed?

STEPS is evidence based. Inspired by the New Forest Parenting Programme, a face-to-face parent training intervention, its content has been shaped by the latest research about parenting and child behaviour as well as many years of clinical experience.

### How is STEPS implemented?

STEPS can be accessed through a variety of devices. Parents can move through the content (steps) at their own pace and at any time of day. The order of the steps is fixed (see 'How is STEPS structured?'), although there is a degree of choice within each step. STEPS is an unguided intervention, which means there is no personal clinical support for parents progressing through STEPS. The content is delivered mainly using short videos and audio clips. During onboarding each parent will register with the app and choose one of four 'buddies' – a parent character played by an actor, who will accompany them on their STEPS journey.

### How is STEPS structured?

STEPS has two preparatory modules, "onboarding" and "introduction", followed by eight separate intervention modules (steps). These steps must be followed in order.

### What are the eight steps?

1. **Make a fresh start** – Encourages parents to see their child and themselves in a new, more positive way.
2. **Look after yourself** – Emphasizes how important it is for parents to find time for themselves and to make links with other parents.
3. **Get co-operation** – Explains ways parents can communicate more effectively with their children.
4. **Build confidence** – Highlights how important it is for parents to create situations in which they can praise their child.
5. **Keep it cool** – Helps parents to think of ways they can avoid losing their temper with their children when they are being difficult.
6. **Guide & support** – Shows how parents can help their children navigate around difficult situations where they may find themselves getting upset.

7. **Structure & boundaries you can trust** – Demonstrates how vital it is that everyone signs up to and follows the house rules.
8. **Reduce conflict and improve behaviour** – Explains how using rewards and sanctions can promote better behaviour in children.

### What elements are included in the steps?

Each step has a similar structure and includes the following common elements:

- i) **Aims:** sets out the themes to be covered in a step presented by Buddy.
- ii) **Science:** provides a short and easy to understand video-description of the evidence behind a step's message presented by a real-life expert.
- iii) **Examples:** videos of parents (played by actors) discussing their parenting experiences.
- iv) **Skills:** audio presentations of specific skills in simple short sentences accompanied by graphical illustrations.
- v) **Reflections:** a chance for parents to write or talk about their experiences.
- vi) **Resources:** downloadable aides and guides relating to each step.

### How long will STEPS take to complete?

This will depend on the pace and frequency of usage. However, each of the 8 steps are designed to take about 20 minutes if completed in one go.

### How will engagement be encouraged?

The app has an attractive design and is easy to use. The use of buddies and pre-recorded prompts automatically sent to parents' devices will help maintain engagement and remind users to reconnect (see table 1).

### What happens if parents are having difficulty?

There will be support for parents encountering technical difficulties. For any serious clinical concerns, parents will be provided with contact details for the clinical service to whom they were referred as well as direct contact details for crisis services.

### What information will be recorded?

Each parent will be assigned a unique ID, which will be used to link app usage data with the offline study information. Usage data including the number of steps, elements completed, the amount of time parents were engaged with the app and the time of day the app was accessed will be collected.

### Who created STEPS?

STEPS concepts and content was designed by Edmund Sonuga-Barke, David Daley, Johnny Downs, Hanna Kovshoff, Jana Kreppner and Margaret Thompson with Samuele Cortese and Cathy Laver-Bradbury providing advice. STEPS visual design and digital implementation was completed by TOAD with funding provided to Sonuga-Barke by the South London & Maudsley NHS Trust. Videos were produced by Eye Witness Productions Ltd. funded by Solent NHS Trust. Special thanks go to Catherine Thompson for her work on an earlier prototype – *New Forest On-Line*.

**Table 1. All prompts sent to app users (grey fill – messages sent via the app; white fill – messages sent via the team).**

| When?           | Seven days from randomisation                                                                                                                                                                                                                                                                             | One day after download                                                                                                                            | One week after download                                                                                                         | One day after completing Step 1                                                                                                                                                   | One week after completing Step 1                                                                                                                                                                                                                                                                                                                | Seven days from last activity                                                                                                                     | Two months to go                                                                  | After about 6 weeks from download (half-way through access period)                                                                                                                                                                                                                                      | One month to go                                                                                                        | One week to go                                                                                                        |
|-----------------|-----------------------------------------------------------------------------------------------------------------------------------------------------------------------------------------------------------------------------------------------------------------------------------------------------------|---------------------------------------------------------------------------------------------------------------------------------------------------|---------------------------------------------------------------------------------------------------------------------------------|-----------------------------------------------------------------------------------------------------------------------------------------------------------------------------------|-------------------------------------------------------------------------------------------------------------------------------------------------------------------------------------------------------------------------------------------------------------------------------------------------------------------------------------------------|---------------------------------------------------------------------------------------------------------------------------------------------------|-----------------------------------------------------------------------------------|---------------------------------------------------------------------------------------------------------------------------------------------------------------------------------------------------------------------------------------------------------------------------------------------------------|------------------------------------------------------------------------------------------------------------------------|-----------------------------------------------------------------------------------------------------------------------|
| What?           | <p>Hi [Name]</p> <p>Thanks for taking part in OPTIMA. We noticed that you haven't downloaded the STEPS app yet. It is available via the App Store [link] or Google Play [link]</p> <p>If you are having any problems, please reply to this message and we will contact you as soon as we can to help.</p> | <p>Thanks for downloading the STEPS app.</p> <p>Just using it for a few minutes a day can be very useful.</p> <p>We hope you find it helpful.</p> | <p>STEPS TIP: All reflections recorded within the app remain completely private to you and will not be seen by anyone else.</p> | <p>Well done for completing Step 1. Step 2 is all about looking after yourself and includes tips from other parents on finding 'me time'.</p> <p>Click here to have a go now.</p> | <p>Hi [Name]</p> <p>Well done for completing Step 1. Step 2 is all about looking after yourself and includes tips from other parents on finding 'me time'.</p> <p>Click here to have a go now.</p> <p>If you are unsure how to do it or need any help with the app, please reply to this message and we will contact you as soon as we can.</p> | <p>STEPS TIP: When finding time to complete a whole step in one go is tricky, breaking it down into small 'bite-sized' chunks can be helpful.</p> | <p>STEPS UPDATE: You have 2 months left to go on STEPS. Use it while you can.</p> | <p>Hi [name]</p> <p>Thanks for taking part in OPTIMA. It's great to see that you downloaded STEPS. Just dip in and out when you can, at your own pace.</p> <p>If you are unsure how to do it or need any help with the app, please reply to this message and we will contact you as soon as we can.</p> | <p>STEPS UPDATE: You have 1 month left to go on STEPS. There is still time for you to get a lot of out of the app.</p> | <p>STEPS UPDATE: You have 1 week left to go on STEPS. There is still time for you to get a lot of out of the app.</p> |
| How?            | From the research team                                                                                                                                                                                                                                                                                    | Via the app                                                                                                                                       | Via the app                                                                                                                     | Via the app                                                                                                                                                                       | From the research team                                                                                                                                                                                                                                                                                                                          | Via the app                                                                                                                                       | Via the app                                                                       | From the research team                                                                                                                                                                                                                                                                                  | Via the app                                                                                                            | Via the app                                                                                                           |
| How many times? | Two/three times                                                                                                                                                                                                                                                                                           | Once                                                                                                                                              | Once                                                                                                                            | Once                                                                                                                                                                              | Once                                                                                                                                                                                                                                                                                                                                            | Twice                                                                                                                                             | Once                                                                              | Once                                                                                                                                                                                                                                                                                                    | Once                                                                                                                   | Once                                                                                                                  |
| Conditional?    | Yes, has not downloaded the app                                                                                                                                                                                                                                                                           | No                                                                                                                                                | No                                                                                                                              | Yes, has not started Step 2.                                                                                                                                                      | Yes, has not started Step 2.                                                                                                                                                                                                                                                                                                                    | Yes, has not completed the whole app.                                                                                                             | No                                                                                | Yes, downloaded the app but not using it.                                                                                                                                                                                                                                                               | No                                                                                                                     | No                                                                                                                    |



## PARENT INTERVIEW SCHEDULE

### Preamble

- Check that the interviewee has received the information sheet, has initialled the box stating they are happy to be contacted for an interview on consent form, understands the OPTIMA trial project and his/her role in it.
  
- Explain that:
  - The aim of the OPTIMA study is to investigate whether a digital parent education programme, STEPS, can help parents to become more confident and effective in managing their children's difficult behaviour.
  - The research team is talking to some of the parents who are taking part in the study to see how they feel about participating in the trial and using the STEPS app.
  - We are interested in individual experiences and thoughts about STEPS, so please give honest responses, as both positive and negative feedback will help us improve the intervention.
  - We will ask questions relating to your expectations of STEPS, its impact on your parenting and on your child.
  - We will combine all our interview responses so that we can provide an overall picture of parents' views about STEPS. Any comments in the study report are attributed very generally, for example, "A parent commented that..." All comments/opinions will be strictly confidential.

Ask: Do you have any initial questions about the project?

### **Ethics**

- The interview will take about 30-45 minutes
- You do not have to answer any questions that you are not comfortable with and there are no 'right' or 'wrong' answers.
- You can turn your camera off, if you prefer.
- You can stop at any time, no explanation needed
- If you need a comfort break, please just say, that's absolutely fine
- If any question doesn't make sense, ask for an explanation.
- You will receive a £20 shopping voucher as a thank you for taking part. A voucher will be emailed to you within the next 5-7 days.

With your permission we are going to audio/video (if you keep your camera on) record the interview so that we can focus on what you are saying. The interviews will be transcribed by a member of our research team. We remove any reference to any places, clinicians/therapists/family members that may give away your (or others) identity during transcription.

1  
2  
3 The original transcription will be stored in a restricted-access folder restricted-access folder on the  
4 King's College London (KCL) cloud server, and no one other than immediate members of the  
5 research team can access this.  
6

7 Anonymised quotes from transcripts will be used in written reports, published journal articles and  
8 presentations including online. Again, any reference to places/family members/clinicians and so on  
9 will be removed.  
10

11 *Ask:* Do you have any questions about how we use your comments? Please feel free to ask anything  
12 however minor it may seem at this stage or at any time later.  
13

14 *Ask:* Is it okay to record the interview?  
15

- 16
- 17 • If participant not satisfied: answer any questions they have. If they do not want to participate,  
18 thank them for their time and finish the interview at this point.  
19

### 20 **Explain procedure**

21  
22  
23 I will begin the interview with my name, the date, time and the identifying code we have assigned to  
24 you and your child - this is just to keep the recordings organised. All your identifying details will be  
25 removed when the data is transcribed. The first part will be a little about yourself and your family,  
26 followed by general questions about the project such as how you were recruited and your  
27 expectations, then moving on to the STEPS programme more specifically and then ending with any  
28 recommendations and your overall experience of being involved in OPTIMA.  
29

30 *Ask:* Do you have any questions before we start?  
31

32 *Ask:* Is it okay for me to start recording now?  
33

34 *State researcher's name, date, time, and identifying code (for data management)*  
35

### 36 **Warm up**

37  
38  
39 Please tell me a bit about your family. Where do you live? How many children do you have?  
40

41  
42 Can you tell me why you went for an assessment for your child (name). Did you go via school? Did  
43 you self-refer? GP?  
44

45 Thinking about the last three months you have taken part in the trial, have you noticed any changes  
46 in your child's behaviour? Types of behaviour? Severity of behaviour? Frequency and so on.  
47

### 48 **I am now going to ask you some questions about being part of the OPTIMA trial and using the** 49 **STEPS app.** 50

- 51 1) Tell me a bit more about your technical experience of using the app  
52 - How did you feel about the downloading/logging on process?  
53 - Was it technically easy to use/easy to understand?  
54 - How did you feel about the way the material was presented? Was it easy to navigate  
55 each STEP  
56 - Did you receive reminders to use the app? If so, how did you feel about these (eg length,  
57 regularity)  
58  
59  
60

- 1  
2  
3  
4  
5  
6 2) Tell me a bit more about what you thought about the content of STEPS
- 7 - What did you think about what was included? (thinking about the videos/text)
  - 8 - How did you decide which buddy to choose? Did you change buddies at all while using
  - 9 the app? What did you think about the buddies? (If they did not like the buddies, probe
  - 10 asking what would have made them like them better/what type of buddy would they
  - 11 like to see).
  - 12 - If you used the STEPS that included examples with children, what did you think about
  - 13 these examples? (Probe would they have like to see more of the children? If they did not
  - 14 like these examples, why?)
  - 15 - Was there any content that you felt worked particularly well? Anything that could have
  - 16 done better?
  - 17
  - 18
  - 19
  - 20
- 21 3) Using the app
- 22 - At the time of using the app, what did your life look like? Would you say it was as
  - 23 normal, busier, quieter?
  - 24 - Did you go through all the STEPS? If not, which/how many STEPS did you do?
  - 25 - If you did not complete all STEPS was there a reason for this? What, if anything, would
  - 26 have made you complete all 8 STEPS?
  - 27 - How did you find fitting the recommendations/strategies into everyday life?
  - 28 - Were there any times of day in particular that you used the app?
  - 29 - Were there any particular places that you used the app? Prompt: At home, car, on
  - 30 school run etc
  - 31 - Did you use the STEP in the order it was set out or did you move around within each
  - 32 STEP (eg download resources before watching the film clip).
  - 33 - Did you complete a STEP all in one go or did you dip in and out?
  - 34 - Did you show the app or talk about it to anyone in your family such as partner or
  - 35 grandparents? Did anyone else interact with the app? If so, how often?
  - 36
  - 37
  - 38
  - 39
  - 40
  - 41
- 42 4) Implementing the app
- 43 - Did STEPS influence the way you approached your child's behaviour? If yes, in what way.
  - 44 If no, why do you think this was?
  - 45 - Did you use any of the strategies in the app? If so which ones? If you did not make any
  - 46 changes to parenting or your thinking, why?
  - 47
  - 48
  - 49
- 50 5) Expectations and reality of using the app
- 51 - Thinking about your **expectations** of STEPS prior to usage. How effective did you
  - 52 **expect** it to be? Prompt for expected effects
  - 53 - Did you expect benefits in any other aspects of life?
  - 54 - Thinking about the **reality** of using the STEPS once you had started using it. How
  - 55 effective did you find it to be? Prompt for impact on child's behaviour.
  - 56 - Did you find benefits in any other aspects of life?
  - 57 - Which aspects of the STEPS programme were particularly helpful/unhelpful?
  - 58
  - 59
  - 60

1  
2  
3 **Follow up question depending on answer:** You have mentioned that the programme  
4 impacted on X (Follow-up from previous questions). How do you think STEPS influenced  
5 that? Was there anything that influenced the impact that STEPS had? If no impacts prompt  
6 why?  
7  
8

9 6) Would you change anything about the STEPS intervention?

- 10 - What additional information, if any, should be included?
- 11 - Was anything included that was unnecessary?

12  
13  
14 7) How did you feel about receiving STEPS as a digital intervention?

- 15 - Would you have preferred another format? If so what?

16  
17 8) Had you received any parent training prior to (or during) being offered STEPS? If no move on to  
18 next question. If yes, ask  
19

- 20 - What type of parenting training did you receive? When did you receive it?
- 21 - Did the other PT change the way you viewed STEPS? Probe: Was it helpful? Different?

22  
23  
24  
25  
26  
27 Thank you for answering these questions. We only have a few questions left now and these will  
28 focus on the future of STEPS:  
29

### 30 **Future Direction**

31  
32 8) If the STEPS programme is found to be effective, are there any changes you can think of that  
33 we should make before it is routinely offered to parents seeking help for their child's  
34 behavioural difficulties?  
35

36  
37 9) At what point in seeking support from a service do you think it would be most helpful for  
38 parents to be given access to STEPS?  
39

- 40 - How should this access be given (e.g. through the school, GP, CAMHS)
- 41 - Would you recommend the STEPS programme to other parents whose children need support?
- 42 - Can you give me a few words that you would use to describe the STEPS app to someone else?

43  
44  
45  
46 **For the final questions I wanted to ask about your experiences of the recruitment process into the**  
47 **OPTIMA trial. The OPTIMA trial is a study where we are testing whether providing support to**  
48 **parents on a service waitlist via a mobile phone app is an effective way of helping them to deal**  
49 **with some parenting challenges.**  
50

51 10) How did you feel about the way you were approached to take part? If you remember how  
52 long you had been on the waiting list when we contacted you, would you have preferred to  
53 be contacted earlier or later on?  
54

55  
56 11) What made you decide to take part in the study? What were your initial thoughts about the  
57 OPTIMA study?  
58  
59  
60

- 1  
2  
3 12) How did you feel when you were told you would be testing the STEPS app?  
4 - What did you hope to get out of testing the app from both you and your child's point of  
5 view?  
6  
7

- 8 13) Finally, what did you think of the online questionnaires such as how long they took, the ease of  
9 understanding the questions and getting a voucher as an incentive.  
10  
11

### 12 **End of questions**

14 That reaches the end of the interview and questions I wanted to ask you.

16 Thank you so much for giving me your time.

- 17  
18 • Do you have anything else you wish to speak about that hasn't been mentioned?  
19  
20 • Let interviewee talk if they have anything else to add  
21  
22 • If nothing else – then close interview  
23

24 If you are okay to end the interview there, I will stop recording now.  
25  
26

27 *Stop recording*  
28  
29

### 30 **Mood Repair**

31  
32  
33 Ask the participant if they have anything nice planned for the rest of the day. If they have any family  
34 plans for the weekend (or similar ensuring the participants mood is lifted before you close the  
35 interview).  
36

### 37 **Debriefing**

- 38  
39  
40 • Ask how they are feeling – whether anything in the interview has troubled them or  
41 distressed them or if anything requires clarification  
42  
43 • They can email me if they have any follow up questions  
44  
45 • Thank them again, and ask if they are feeling okay to end interview here.  
46  
47  
48 • Remind about the voucher.  
49  
50  
51  
52  
53  
54  
55  
56  
57  
58  
59  
60

## CLINICIAN INTERVIEW SCHEDULE

### Preamble

Check that the interviewee has received the information sheet, understands the OPTIMA project and his/her role in it

Explain that:

The aim of the OPTIMA trial was to investigate whether a parenting programme (STEPS) delivered online to parents seeking help from CAMHS for their child's behavioural difficulties was effective in reducing rates of oppositional defiant disorder.

The research team is speaking to parents and clinicians who were involved in the trial.

We are interested in individual experiences and thoughts about the OPTIMA trial so please give honest responses, as both positive and negative feedback will help us improve the intervention. Explain that they will be asked questions relating to their involvement in the OPTIMA, experiences with recruitment, and factors relating to their institution e.g. NHS. However, we combine all the data we collect to provide an overall picture of OPTIMA and its implementation and any comments in the report are attributed very generally, for example, "A clinician commented that..." All comments/opinions will be strictly confidential.

Ask: Do you have any initial questions about the project?

### Ethics

Remind interviewee:

- The interview will take about 20 minutes
- You do not have to answer any questions that you are not comfortable with and there are no 'right' or 'wrong' answers
- You can turn your camera off if you wish
- You can stop at any time, no explanation needed
- If you need a comfort break, please just say, that's absolutely fine
- If any question doesn't make sense, ask for an explanation

With your permission we are going to record the interview so that we can focus on what you are saying. This will be transcribed by a member of the research team.

We remove any reference to any places, therapists/family members that may give away yours (or others) identity during transcription.

The original transcription will be stored in a restricted-access folder on the King's College London (KCL) cloud server and no one other than immediate members of the research team can access this.

Ask: Do you have any questions about how we use your comments?

Ask: Is it okay to record the interview?

- If participant not satisfied: answer any questions they have. If they do not want to participate, thank them for their time and finish the interview at this point.

### Explain procedure

I will begin the interview with my name, the date, and time - this is just to keep the recordings organised. All your details will be anonymised when the data is transcribed. The first part will be a little about yourself, followed by general questions about the OPTIMA trial, moving on to your views on recruitment, and ending with institutional issues and future direction.

Ask: Do you have any questions before we start?

Ask: Is it okay for me to start recording now?

### Start Interview

*State researcher's name, date, and time (for data management)*

I want to start by asking some questions about you:

### **Background Questions**

Please briefly describe your professional background

**Prompt** (if not covered)

- What is your job title?
- How long have you worked as a clinician with children/young people?

What treatment recommendations would you normally make for young people with ...

**Prompt** (if not covered)

- Referral to a specialist therapist?
- Behavioural treatments and/or medication (referred for? Or given by themselves?)

Now I am going to ask you questions about being part of the OPTIMA trial (if Clinician has not heard about the OPTIMA trial, move on to the next question).

### **Questions about OPTIMA trial**

How did you find out about the STEPS intervention?

What were your expectations of the OPTIMA trial?

- Did it sound like something that would be effective?
- Did you expect people to take part?

Thank you for these answers, that's been really helpful. I'd now like to move on and ask about your thoughts on the STEPS intervention (give a brief summary of the STEPS intervention here).

### **Questions about the STEPS intervention**

What do you think about offering parents on the waiting list for assessment child behavioural difficulties the opportunity to take part in the OPTIMA trial and receive STEPS?

Why do you think parents may have agreed to take part?

Why do you think parents may have declined to take part?

Why do you think parents may not have persisted with the STEPS intervention?

How might STEPS impact on child behaviour?

What factors might influence the effectiveness of the STEPS intervention? Prompt parent factors.  
Prompt child factors

What might be the barriers to engaging with an online intervention such as STEPS (if not covered) .

How can we better engage parents and families in future work?

Have you received any feedback from parents about the STEPS intervention? If so, what was it?

How do you think online parenting programmes compare to face to face programmes?

Thank you for answering those questions. We only have a few questions left now and these will focus on institutional factors:

**Institutional factors**

How do you think the NHS could incorporate the STEPS programme into everyday practice?

**Prompt**

- Feasibility
- Benefits
- Obstacles

Do you think the NHS would be able to/willing to fund such a project?

**Prompt**

- Costs versus benefits
- Good use of money?

**Future Direction**

Overall, would you recommend the STEPS intervention to parents?

**Prompt**

- Why?
- At what point of referral/child age?

**End of questions**

That reaches the end of the interview and questions I wanted to ask you.

Thank you very much for your time.

- Do you have anything else you wish to speak about that hasn't been mentioned?
  - Let interviewee talk if they have anything else to add
  - If nothing else – then close interview

If you are okay to end the interview there, I will turn the recording off.

*Turn recording off*

**Debriefing**

- They can email me if they have any follow up questions/comments
- Thank them again, and ask if they are feeling okay to end interview here.
